# Supplementary material
Source: PubMed Central journal article supplement (PMC5771885)
Supplement: NIHMS925849-supplement.pdf [file NIHMS925849-supplement.pdf]

**Title:** Learning Bundled Care Opportunities from Electronic Medical Records

**Authors:** You Chen<sup>1</sup>, Abel N. Kho<sup>2</sup>, David Liebovitz<sup>3</sup>, Catherine Ivory<sup>4</sup>, Sarah Osmundson<sup>5</sup>, Jiang Bian<sup>6</sup>, and Bradley A. Malin<sup>1,7,8</sup>

**Author Affiliations:**

<sup>1</sup>Dept. of Biomedical Informatics, School of Medicine, Vanderbilt University, Nashville, TN

<sup>2</sup>Institute for Public Health and Medicine, Northwestern University, Chicago, IL

<sup>3</sup>School of Medicine, University of Chicago, Chicago, IL

<sup>4</sup>School of Nursing, Vanderbilt University, Nashville, TN

<sup>5</sup>Dept. of Obstetrics and Gynecology, School of Medicine, Vanderbilt University, Nashville, TN

<sup>6</sup>Dept. of Health Outcomes and Policy, University of Florida, Gainesville, FL

<sup>7</sup>Dept. of Biostatistics, School of Medicine, Vanderbilt University, Nashville, TN

<sup>8</sup>Dept. of Electrical Engineering & Computer Science, School of Engineering, Vanderbilt University, Nashville, TN

**To Whom Correspondence Should Be Addressed:**

You Chen, Ph.D.

2525 West End Ave, Suite 1475

Department of Biomedical Informatics

Vanderbilt University

Nashville, TN 37203 USA

Email: you.chen@vanderbilt.edu

Phone: +1 615 343 1939

Fax: +1 615 322 0502

## Appendix A Survey Questions

The four survey questions are shown in Table A1. Each question is accompanied by a pair of (inferred, random) clusters of health conditions. The inferred cluster was learned by our framework. The other was randomly generated, but constrained to consist of the same number of PheWAS codes as the inferred cluster. The survey respondents were not provided with any indication of which cluster was inferred by our framework and which was randomly generated.

**Table A1 Each survey question contains one inferred cluster and one random cluster of the same size.**

| <b>Question 1: To what extent do you believe health conditions in the displayed group can be managed in a bundled manner? There are two separate groups and we ask that you evaluate each one independently of the other.</b>                                                                                                                                                                                                                                                                                                                                                                                                     |                                                                                                                                                                                                                                                                                                                                                                                                                                                             |
|-----------------------------------------------------------------------------------------------------------------------------------------------------------------------------------------------------------------------------------------------------------------------------------------------------------------------------------------------------------------------------------------------------------------------------------------------------------------------------------------------------------------------------------------------------------------------------------------------------------------------------------|-------------------------------------------------------------------------------------------------------------------------------------------------------------------------------------------------------------------------------------------------------------------------------------------------------------------------------------------------------------------------------------------------------------------------------------------------------------|
| <p>Obstetrical/birth trauma</p> <p>Late pregnancy and failed induction</p> <p>Other conditions of the mother complicating pregnancy</p> <p>Short gestation; low birth weight; and fetal growth retardation</p> <p>Other perinatal conditions</p> <p>Perinatal jaundice/isoimmunization</p> <p>Skull fracture and other intracranial injury</p> <p>Internal injury to organs</p> <p><input type="checkbox"/> Not at all likely</p> <p><input type="checkbox"/> Slightly likely</p> <p><input type="checkbox"/> Moderately likely</p> <p><input type="checkbox"/> Very likely</p> <p><input type="checkbox"/> Completely likely</p> | <p>Fever of unknown origin</p> <p>Diarrhea</p> <p>Chemotherapy</p> <p>Pancytopenia</p> <p>Gastroesophageal reflux disease</p> <p>Essential hypertension</p> <p>Asthma</p> <p>Coronary atherosclerosis</p> <p><input type="checkbox"/> Not at all likely</p> <p><input type="checkbox"/> Slightly likely</p> <p><input type="checkbox"/> Moderately likely</p> <p><input type="checkbox"/> Very likely</p> <p><input type="checkbox"/> Completely likely</p> |

**Question 2: To what extent do you believe health conditions in the displayed group can be managed in a bundled manner? There are two separate groups and we ask that you evaluate each one independently of the other.**

Hypothyroidism

Anemia NOS

Hypopotassemia

Problems associated with amniotic cavity and membranes

Systolic/diastolic heart failure

Prostate cancer

Other abnormal glucose

- Not at all likely
- Slightly likely
- Moderately likely
- Very likely
- Completely likely

Obstetrical/birth trauma

Umbilical cord complications during labor and delivery

Other conditions of the mother complicating pregnancy

Malposition and malpresentation of fetus or obstruction

Problems associated with amniotic cavity and membranes

Abnormality pelvic soft tissues & organs complicating pregnancy

Indications for care or intervention related to labor and delivery NEC

- Not at all likely
- Slightly likely
- Moderately likely
- Very likely
- Completely likely

**Question 3: To what extent do you believe health conditions in the displayed group can be managed in a bundled manner? There are two separate groups and we ask that you evaluate each one independently of the other.**

Hyperlipidemia

Essential hypertension

Hyperplasia of prostate

Anemia NOS

Gastroesophageal Reflux Disease

Osteoarthritis; localized

Obstructive sleep apnea

Asthma

Hypothyroidism

Hypopotassemia

- Not at all likely
- Slightly likely
- Moderately likely
- Very likely
- Completely likely

Diarrhea

Osteoarthritis; localized

Hyperplasia of prostate

Transient cerebral ischemia

Late effects of cerebrovascular disease

Abnormality pelvic soft tissues & organs complicating pregnancy

Hypertensive chronic kidney disease

Pneumonia

Atrial fibrillation

Sepsis

- Not at all likely
- Slightly likely
- Moderately likely
- Very likely
- Completely likely

**Question 4: To what extent do you believe health conditions in the displayed group can be managed in a bundled manner? There are two separate groups and we ask that you evaluate each one independently of the other.**

Atrial fibrillation  
 Systolic/diastolic heart failure  
 Heart failure  
 Venous embolism & thrombosis  
 Hemorrhagic disorder due to intrinsic circulating anticoagulants  
 Hypertensive chronic kidney disease  
 Chronic renal failure  
 Depression  
 Urinary tract infection  
 Decubitus ulcer  
 Type 2 diabetes  
 Hyperlipidemia  
 Essential hypertension  
 Substance addiction and disorders  
 Tobacco use disorder  
 Transient cerebral ischemia

- Not at all likely
- Slightly likely
- Moderately likely
- Very likely
- Completely likely

Skull fracture and other intracranial injury  
 Internal injury to organs  
 Hypothyroidism  
 Anemia  
 Hypopotassemia  
 Diarrhea  
 Chemotherapy  
 Hyperlipidemia  
 Essential hypertension  
 Hyperplasia of prostate  
 Chronic airway obstruction  
 Malposition and malpresentation of fetus or obstruction  
 Problems associated with amniotic cavity and membranes  
 Gastroesophageal reflux disease  
 Liver abscess and sequelae of chronic liver disease  
 Multiple gestation

- Not at all likely
- Slightly likely
- Moderately likely
- Very likely
- Completely likely

## **Appendix B: Workflow Topics**

As noted in the main manuscript, the framework discovered 25 workflows topics. Each workflow topic consists of the top 10 subsequences with the highest probability for that topic.

We visualized each workflow as a process graph via Business Process Model and Notation (BPMN) in ProM. There are six symbols within a graph, which are introduced as:

**Rounded rectangle:** An event.

**Green circle:** A start state.

**Red circle:** A completed state.

**Right arrow:** A transition process.

**A pair of crosses:** A loop for all events within.

**Small circle:** A temporal state.

**Workflow w<sub>1</sub>**

|                                                                                                            |         |
|------------------------------------------------------------------------------------------------------------|---------|
| Patient Care Staff Nurse (Pilot) -> Medical Records                                                        | 0.04726 |
| Medical Records -> Patient Care Staff Nurse (Pilot)                                                        | 0.04403 |
| Patient Care Staff Nurse (Pilot) -> Medical Records -> Patient Care Staff Nurse (Pilot)                    | 0.03230 |
| Medical Records -> Patient Care Staff Nurse (Pilot) -> Medical Records                                     | 0.03119 |
| Patient Care Staff Nurse (Pilot) -> Medical Records -> Patient Care Staff Nurse (Pilot) -> Medical Records | 0.03077 |
| RAD - Technologist -> ED NMH Physician-CPOE                                                                | 0.01903 |
| Patient Care Staff Nurse -> View Only PC 3                                                                 | 0.01491 |
| View Only PC 3 -> Patient Care Staff Nurse                                                                 | 0.01353 |
| Patient Care Staff Nurse -> View Only PC 3 -> Patient Care Staff Nurse                                     | 0.01300 |
| Rehab OT -> Medical Records                                                                                | 0.01110 |

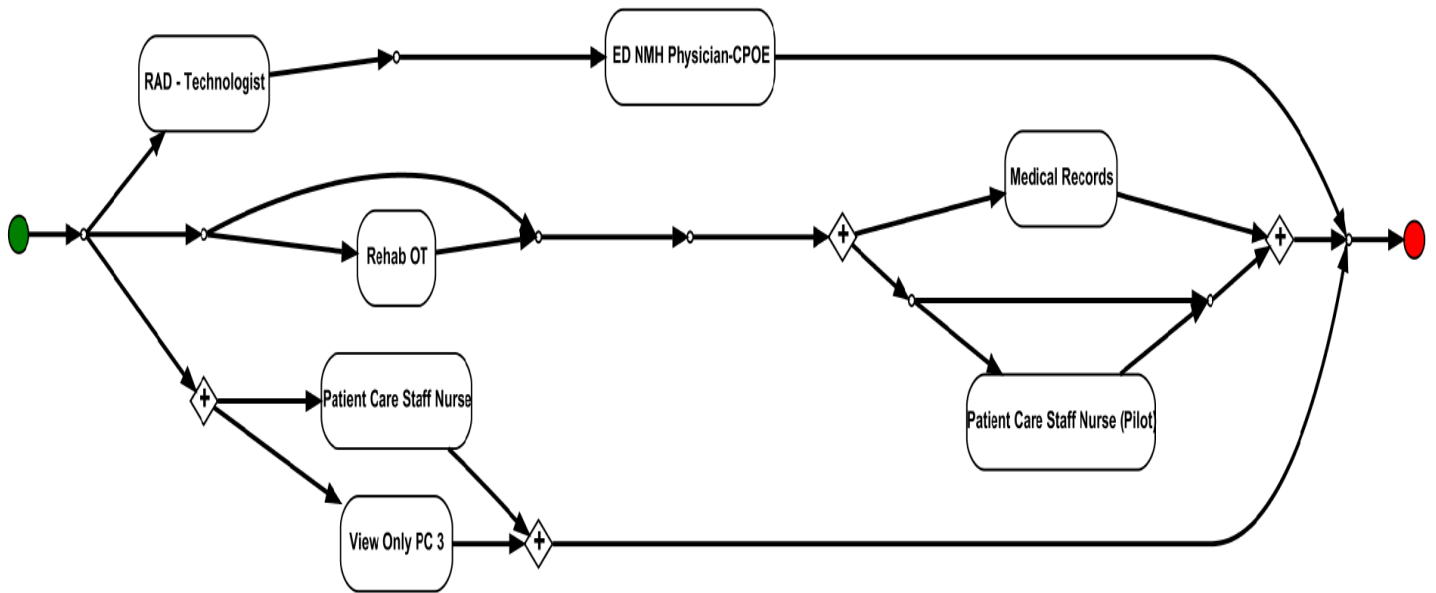

**Figure A1 Process graph of workflow w<sub>1</sub>**

## Workflow $w_2$

|                                                                                |         |
|--------------------------------------------------------------------------------|---------|
| NMH Physician Office - CPOE -> Utilization Review (UR)/ Quality Assurance (QA) | 0.02523 |
| UR/ QA -> NMH Physician Office - CPOE                                          | 0.02296 |
| Dietary 1 -> Medical Records                                                   | 0.01846 |
| UR/QA -> NMH Physician Office - CPOE -> UR/QA                                  | 0.01676 |
| NMH Resident/Fellow-CPOE -> RAD - Nurse                                        | 0.01657 |
| NMH Physician Office - CPOE -> UR/QA 1 -> NMH Physician Office - CPOE          | 0.01652 |
| RAD - Nurse -> NMH Resident/Fellow-CPOE                                        | 0.01628 |
| Medical Records -> Dietary 1                                                   | 0.01519 |
| NMH Resident/Fellow-CPOE -> RAD - Nurse -> NMH Resident/Fellow-CPOE            | 0.01278 |
| Clinical Documentation Consultant -> NMH Resident/Fellow-CPOE                  | 0.01174 |

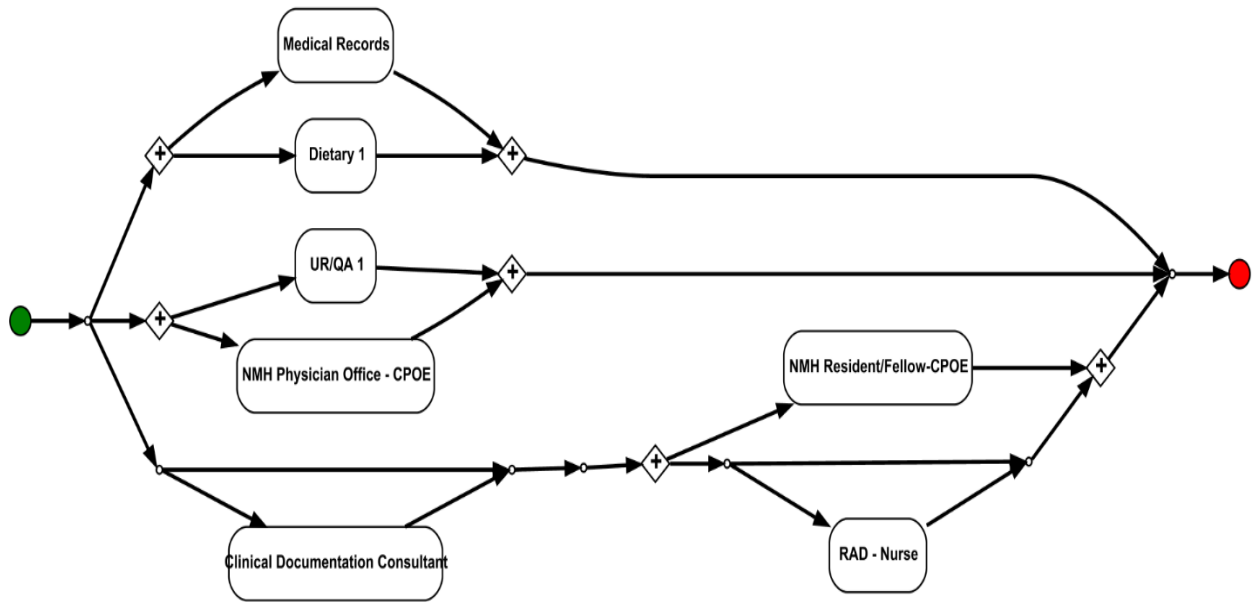

Figure A2 Process graph of workflow  $w_2$



### Workflow $w_3$

|                                                                                                                    |         |
|--------------------------------------------------------------------------------------------------------------------|---------|
| NMPG MD - CPOE -> Patient Care Assistive Staff                                                                     | 0.01895 |
| Patient Care Assistive Staff -> NMPG MD - CPOE                                                                     | 0.01771 |
| NMPG MD - CPOE -> NMPG MD - CPOE                                                                                   | 0.01591 |
| NMPG MD - CPOE -> NMPG MD - CPOE -> Patient Care Assistive Staff                                                   | 0.01329 |
| NMPG MD - CPOE -> Patient Care Assistive Staff -> NMPG MD - CPOE                                                   | 0.01310 |
| Patient Care Assistive Staff -> NMPG MD - CPOE -> Patient Care Assistive Staff                                     | 0.01299 |
| Patient Care Assistive Staff -> NMPG MD - CPOE -> NMPG MD - CPOE                                                   | 0.01284 |
| NMPG MD - CPOE -> NMPG MD - CPOE -> Patient Care Assistive Staff -> NMPG MD - CPOE -> Patient Care Assistive Staff | 0.01266 |
| NMPG MD - CPOE -> Patient Care Assistive Staff -> NMPG MD - CPOE -> NMPG MD - CPOE                                 | 0.01266 |
| NMPG MD - CPOE -> NMPG MD - CPOE -> Patient Care Assistive Staff -> NMPG MD - CPOE                                 | 0.01262 |

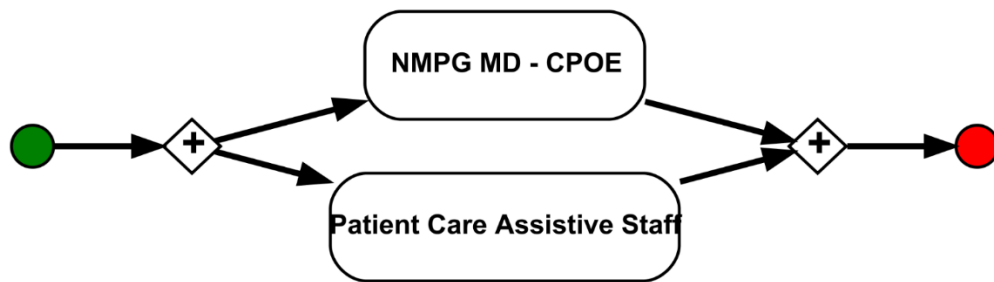

Figure A3 Process graph of workflow  $w_3$

**Workflow w<sub>4</sub>**

|                                                                                          |         |
|------------------------------------------------------------------------------------------|---------|
| Unit Secretary 2 -> Patient Care Staff Nurse (Pilot)                                     | 0.02053 |
| Patient Care Staff Nurse (Pilot) -> Unit Secretary 2                                     | 0.01752 |
| RAD - Resident/Fellow -> Respiratory                                                     | 0.01328 |
| Patient Care Staff Nurse (Pilot) -> Unit Secretary 2 -> Patient Care Staff Nurse (Pilot) | 0.01321 |
| Patient Care Staff Nurse (Pilot) -> Unit Secretary 2 -> Unit Secretary 2                 | 0.01304 |
| Unit Secretary 2 -> Unit Secretary 2 -> Patient Care Staff Nurse (Pilot)                 | 0.01297 |
| Unit Secretary 2 -> Patient Care Staff Nurse (Pilot) -> Unit Secretary 2                 | 0.01290 |
| Respiratory -> RAD - Resident/Fellow                                                     | 0.01225 |
| Physician Office -> Health Information Audit-Consultant                                  | 0.00982 |
| Health Information Audit-Consultant -> Physician Office                                  | 0.00962 |

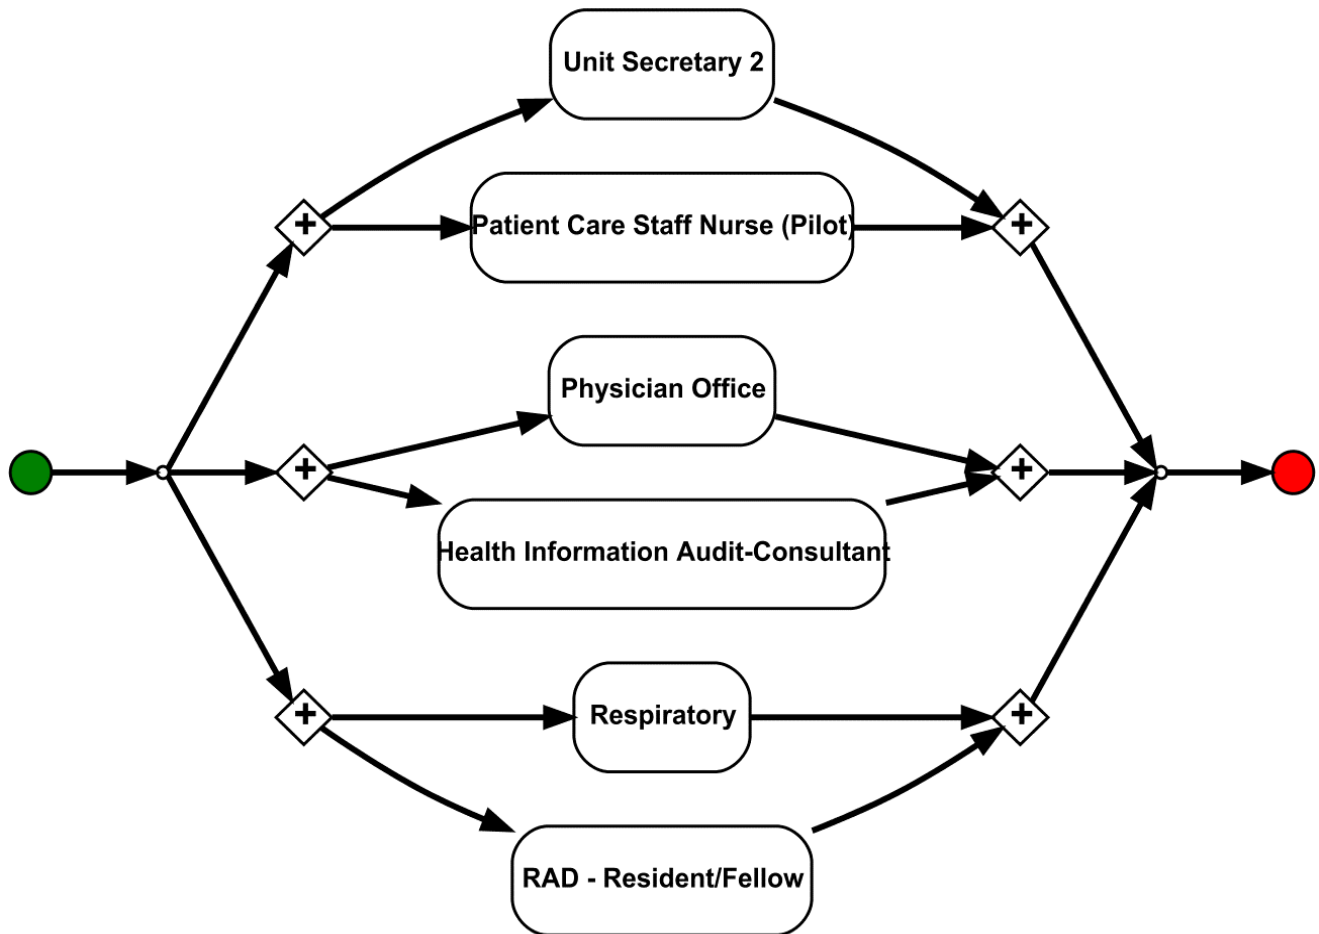

**Figure A4 Process graph of workflow w<sub>4</sub>**

**Workflow w<sub>5</sub>**

|                                                |         |
|------------------------------------------------|---------|
| Student Nurse -> UR/QA 1                       | 0.01501 |
| RAD - Mgr/RC -> UR/QA 1                        | 0.01470 |
| UR/QA 1 -> RAD - Mgr/RC                        | 0.01389 |
| Student Nurse -> RX-Pharmacist                 | 0.01331 |
| RX-Pharmacist -> Student Nurse                 | 0.01322 |
| Patient Care Assistive Staff -> View Only PC 1 | 0.01273 |
| View Only PC 1 -> Patient Care Assistive Staff | 0.01264 |
| UR/QA 1 -> Student Nurse                       | 0.01260 |
| UR/QA 1 -> RAD - Mgr/RC -> UR/QA 1             | 0.00996 |
| UR/QA 1 -> RAD - Mgr/RC -> RAD - Mgr/RC        | 0.00992 |

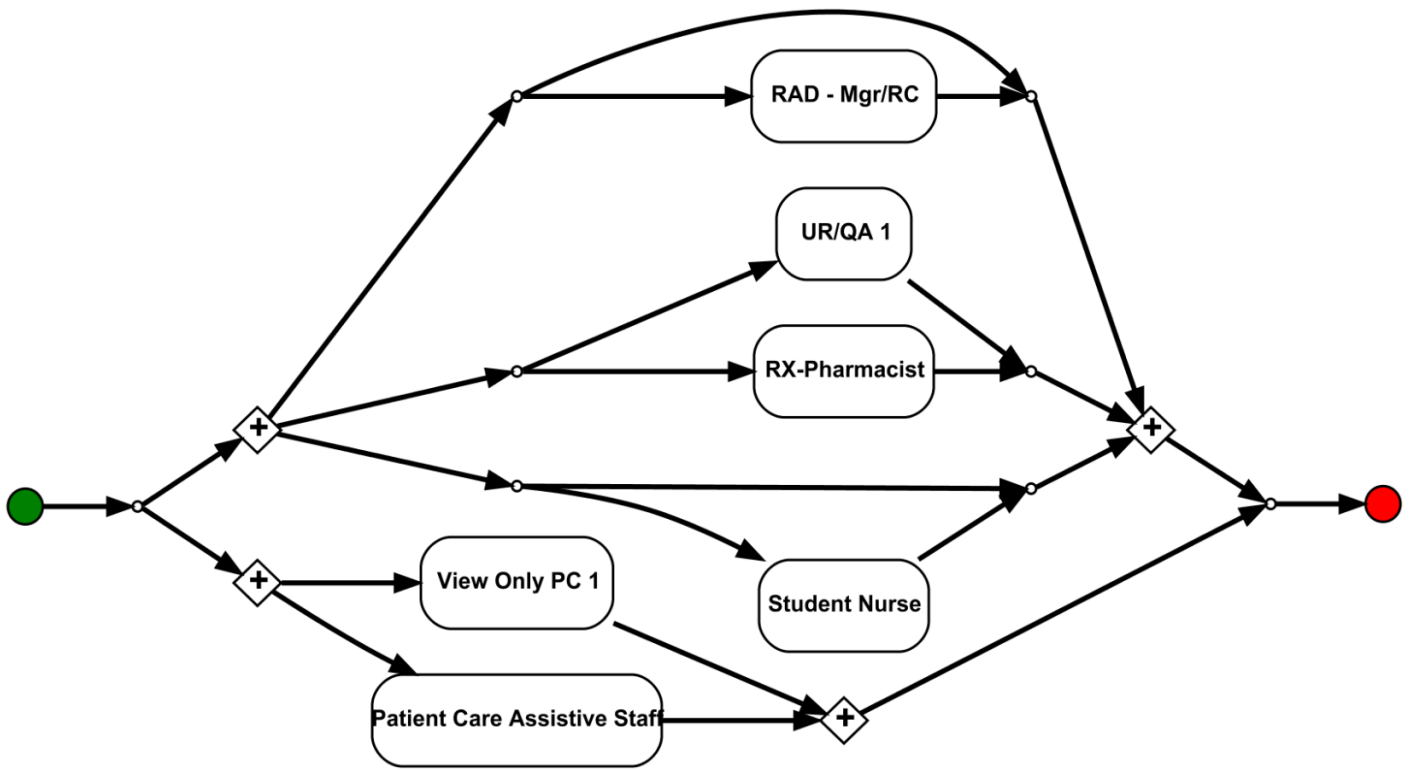

**Figure A5 Process graph of workflow w<sub>5</sub>**

**Workflow w<sub>6</sub>**

|                                                                      |         |
|----------------------------------------------------------------------|---------|
| RAD - Technologist -> Med Student-CPOE                               | 0.01635 |
| Med Student-CPOE -> RAD - Technologist                               | 0.01577 |
| NMH Physician Hospitalist-CPOE -> Rehab PT                           | 0.01437 |
| NMH Resident/Fellow-CPOE -> MLPN-Medicating Licensed Practical Nurse | 0.01421 |
| MLPN-Medicating Licensed Practical Nurse -> NMH Resident/Fellow-CPOE | 0.01378 |
| Rehab PT -> NMH Physician Hospitalist-CPOE                           | 0.01308 |
| RAD - Resident/Fellow -> RX-Pharmacist                               | 0.01191 |
| Med Student-CPOE -> ED NMH Physician-CPOE                            | 0.01168 |
| Patient Care Staff Nurse -> PICC Nurse                               | 0.01125 |
| ED NMH Physician-CPOE -> Med Student-CPOE                            | 0.01106 |

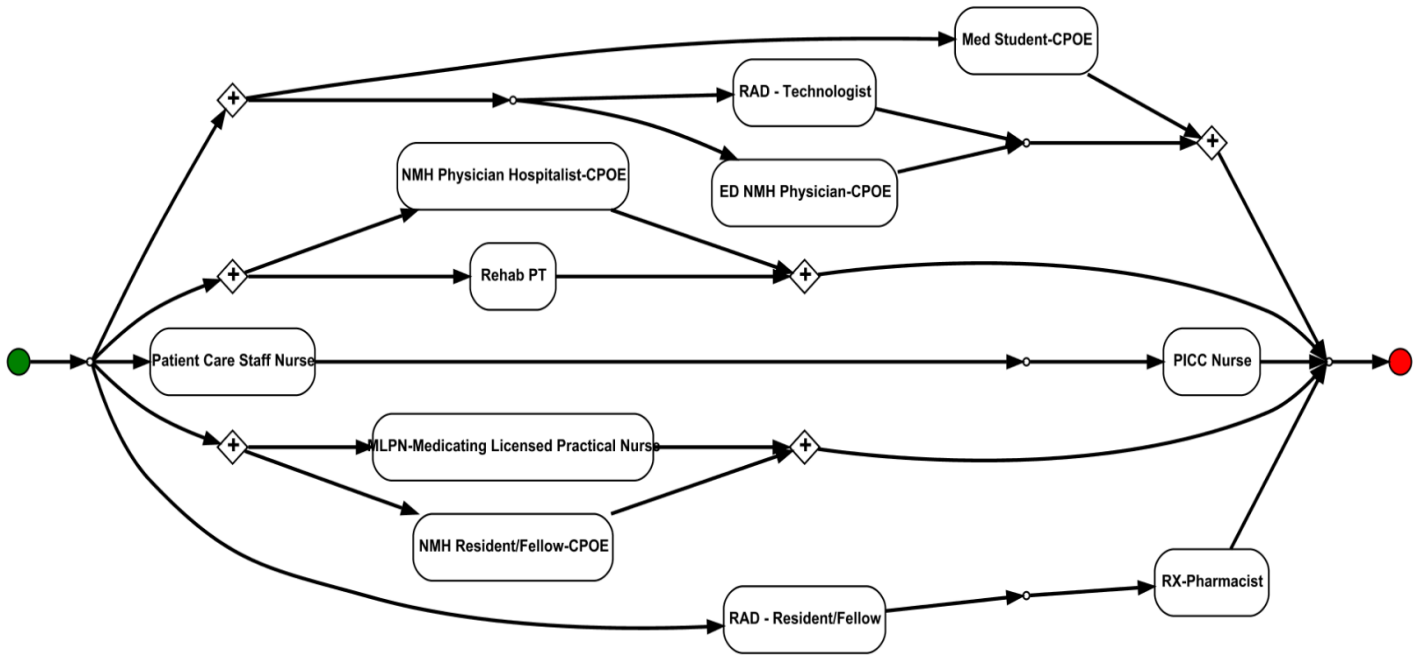

**Figure A6 Process graph of workflow w<sub>6</sub>**

**Workflow w<sub>7</sub>**

|                                                                                                        |         |
|--------------------------------------------------------------------------------------------------------|---------|
| NMH Physician Hospitalist-CPOE -> Medical Records                                                      | 0.01850 |
| Medical Records -> NMH Physician Hospitalist-CPOE                                                      | 0.01693 |
| Student Nurse -> Respiratory                                                                           | 0.01606 |
| Respiratory -> Student Nurse                                                                           | 0.01559 |
| Health Information Audit-Consultant -> Medical Records                                                 | 0.01296 |
| Medical Records -> NMH Physician Hospitalist-CPOE -> Medical Records                                   | 0.01222 |
| ED NMH Physician-CPOE -> NMH Physician Hospitalist-CPOE                                                | 0.01214 |
| NMH Physician Hospitalist-CPOE -> Medical Records -> NMH Physician Hospitalist-CPOE                    | 0.01210 |
| NMH Physician Hospitalist-CPOE -> Medical Records -> NMH Physician Hospitalist-CPOE -> Medical Records | 0.01206 |
| Medical Records -> Health Information Audit-Consultant                                                 | 0.01119 |

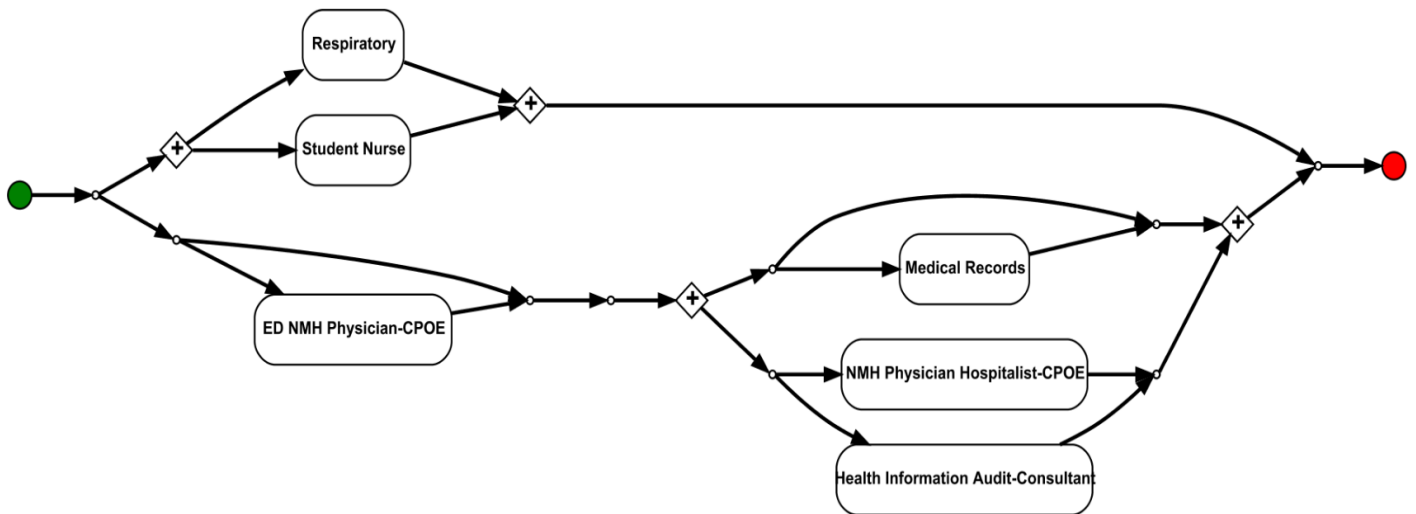

**Figure A7 Process graph of workflow w<sub>7</sub>**

**Workflow w<sub>8</sub>**

|                                                                                                |         |
|------------------------------------------------------------------------------------------------|---------|
| Medical Records - Scanner -> Physician Office                                                  | 0.03089 |
| Physician Office -> SN-RN/Customer Service                                                     | 0.03023 |
| Physician Office -> Medical Records - Scanner                                                  | 0.03005 |
| SN-RN/Customer Service -> Physician Office                                                     | 0.02430 |
| Physician Office -> Medical Records - Scanner -> Physician Office                              | 0.02263 |
| ED Coder -> Physician Office                                                                   | 0.02158 |
| Medical Records - Scanner -> Medical Records - Scanner -> Physician Office                     | 0.02100 |
| Physician Office -> Medical Records - Scanner -> Medical Records - Scanner                     | 0.02096 |
| Medical Records - Scanner -> Physician Office -> Medical Records - Scanner                     | 0.02093 |
| Medical Records - Scanner -> Physician Office -> Medical Records - Scanner -> Physician Office | 0.02071 |

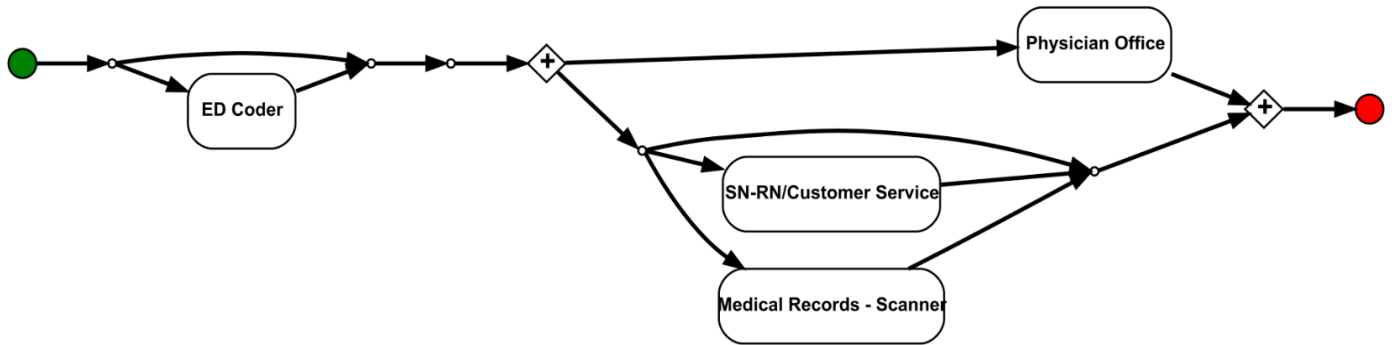

**Figure A8 Process graph of workflow w<sub>8</sub>**

**Workflow w<sub>9</sub>**

|                                                                                    |         |
|------------------------------------------------------------------------------------|---------|
| RAD - Technologist -> ED Unit Secretary                                            | 0.01784 |
| ED Unit Secretary -> RAD - Technologist                                            | 0.01719 |
| NMH Resident/Fellow-CPOE -> Transfer                                               | 0.01360 |
| Transfer -> NMH Resident/Fellow-CPOE                                               | 0.01315 |
| Advanced Practice Clinician - CRNA -> Patient Care Staff Nurse                     | 0.01290 |
| RAD - Technologist -> ED Unit Secretary -> RAD - Technologist                      | 0.01237 |
| Patient Care Staff Nurse -> Advanced Practice Clinician - CRNA                     | 0.01221 |
| ED Unit Secretary -> ED Unit Secretary -> RAD - Technologist                       | 0.01213 |
| RAD - Technologist -> ED Unit Secretary -> ED Unit Secretary                       | 0.01209 |
| ED Unit Secretary -> RAD - Technologist -> ED Unit Secretary -> RAD - Technologist | 0.01192 |

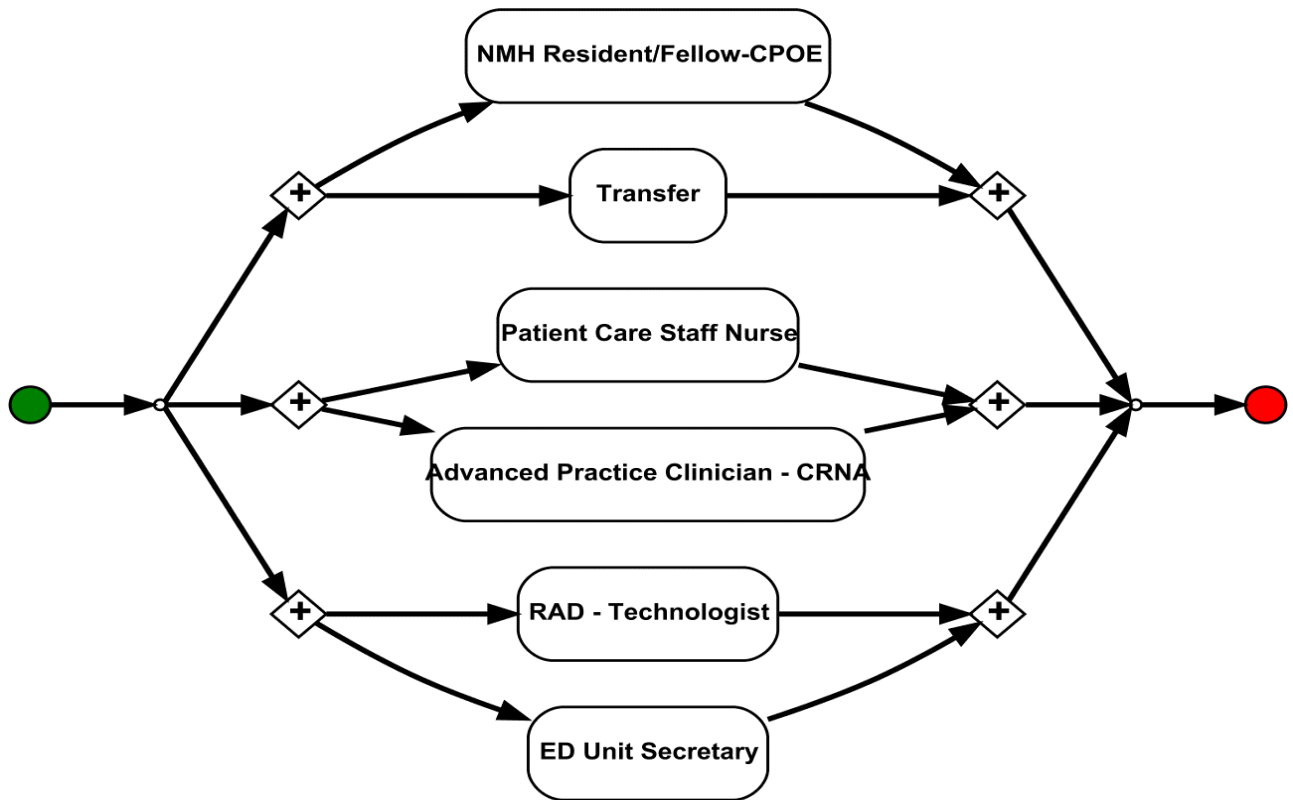

**Figure A9** Process graph of workflow w<sub>9</sub>

## Workflow w<sub>10</sub>

|                                                                        |         |
|------------------------------------------------------------------------|---------|
| Respiratory -> ED Patient Care Staff Nurse                             | 0.01859 |
| ED Patient Care Staff Nurse -> Respiratory                             | 0.01815 |
| Patient Care Staff Nurse (Pilot) -> Advanced Practice Clinician - CPOE | 0.01675 |
| Advanced Practice Clinician - CPOE -> Patient Care Staff Nurse (Pilot) | 0.01667 |
| RAD - Resident/Fellow -> ED Patient Care Staff Nurse                   | 0.01557 |
| SN-RN/Customer Service -> Patient Care Staff Nurse (Pilot)             | 0.01483 |
| Medical Records -> Clinical Documentation Consultant                   | 0.01406 |
| Patient Care Staff Nurse (Pilot) -> SN-RN/Customer Service             | 0.01347 |
| Respiratory -> ED Patient Care Staff Nurse -> Respiratory              | 0.01302 |
| ED Patient Care Staff Nurse -> RAD - Resident/Fellow                   | 0.01269 |

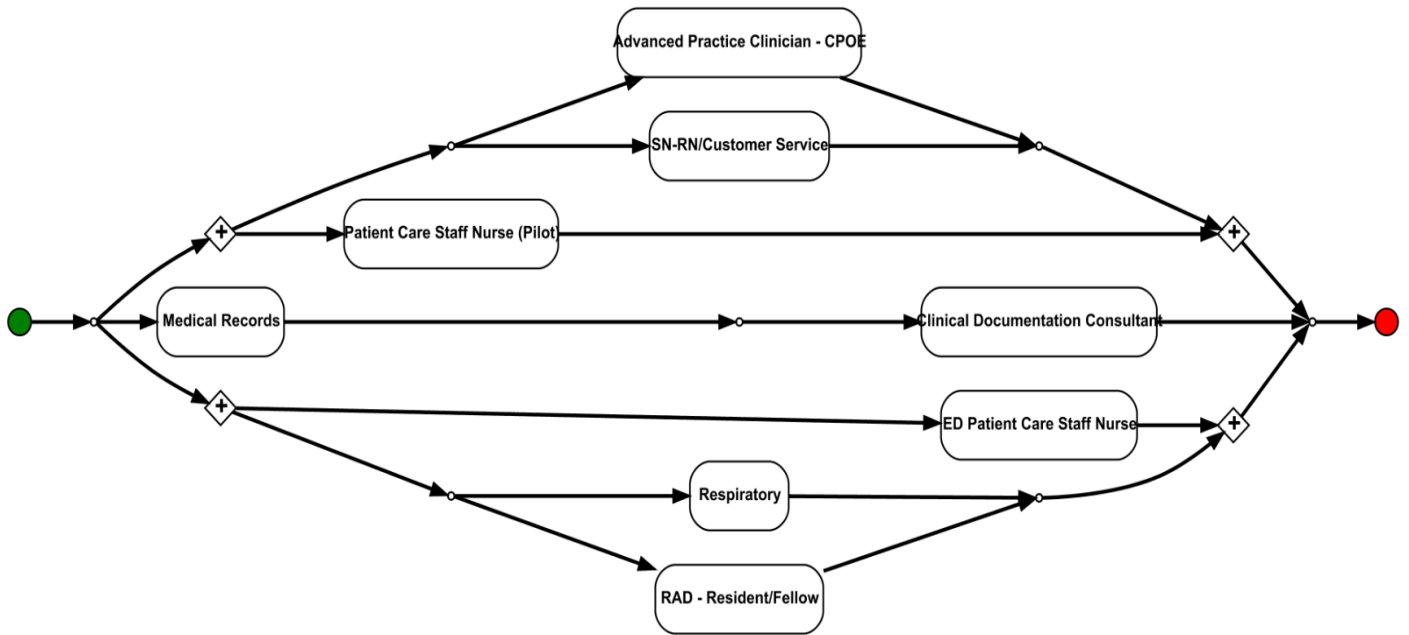

Figure A10 Process graph of workflow w<sub>10</sub>



**Workflow w<sub>11</sub>**

|                                                                                                  |         |
|--------------------------------------------------------------------------------------------------|---------|
| NMH Physician Office - CPOE -> Medical Records                                                   | 0.03341 |
| Medical Records -> NMH Physician Office - CPOE                                                   | 0.02944 |
| Advanced Practice Clinician - CPOE -> NMH Anesthesia-CPOE                                        | 0.02719 |
| NMH Anesthesia-CPOE -> Advanced Practice Clinician - CPOE                                        | 0.02626 |
| RX-Pharmacist -> Unit Secretary 2                                                                | 0.02577 |
| Unit Secretary 2 -> RX-Pharmacist                                                                | 0.02288 |
| NMH Physician Office - CPOE -> Medical Records -> NMH Physician Office - CPOE                    | 0.02165 |
| Medical Records -> NMH Physician Office - CPOE -> Medical Records                                | 0.02131 |
| NMH Physician Office - CPOE -> Medical Records -> NMH Physician Office - CPOE -> Medical Records | 0.02116 |
| NMH Physician Office - CPOE -> RX-Pharmacist                                                     | 0.02008 |

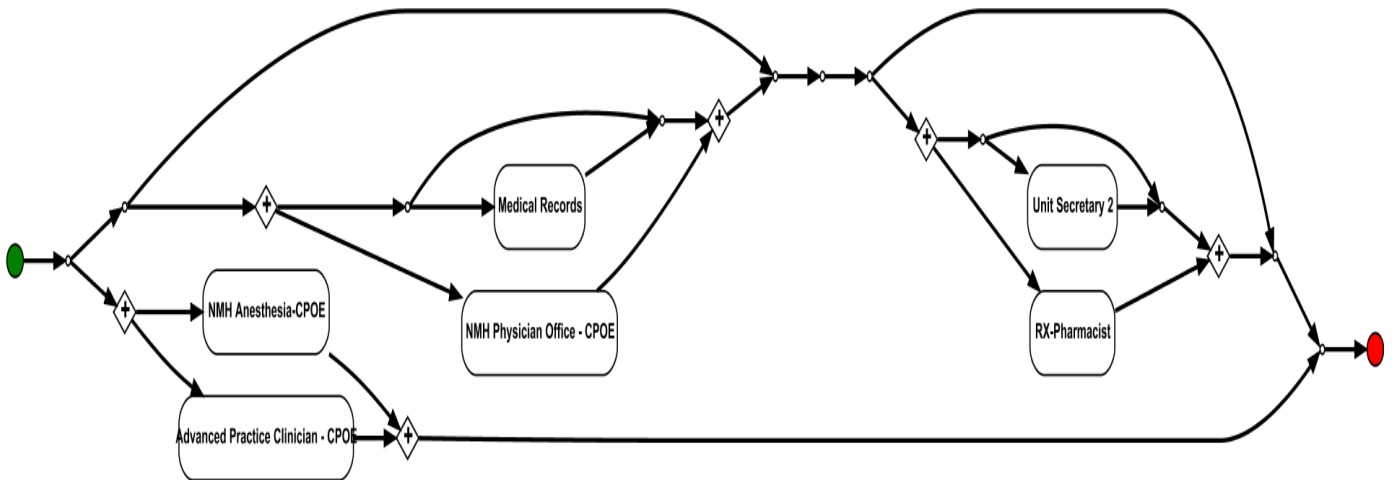

**Figure A11 Process graph of workflow w<sub>11</sub>**

**Workflow w<sub>12</sub>**

|                                                                                                     |         |
|-----------------------------------------------------------------------------------------------------|---------|
| NMH Physician Office - CPOE -> Patient Care Staff Nurse (Pilot)                                     | 0.02177 |
| Patient Care Staff Nurse (Pilot) -> NMH Physician Office - CPOE                                     | 0.02049 |
| NMH Physician Office - CPOE -> Advanced Practice Clinician - CPOE                                   | 0.02002 |
| Respiratory -> NMH Physician Office - CPOE                                                          | 0.01855 |
| Advanced Practice Clinician - CPOE -> NMH Physician Office - CPOE                                   | 0.01808 |
| NMH Physician Office - CPOE -> Respiratory                                                          | 0.01803 |
| Patient Care Staff Nurse (Pilot) -> NMH Physician Office - CPOE -> Patient Care Staff Nurse (Pilot) | 0.01533 |
| SN-OR RN SC -> RX-Pharmacist                                                                        | 0.01529 |
| NMH Resident/Fellow-CPOE -> NU Researcher                                                           | 0.01486 |
| NMH Physician Office - CPOE -> Patient Care Staff Nurse (Pilot) -> NMH Physician Office - CPOE      | 0.01462 |

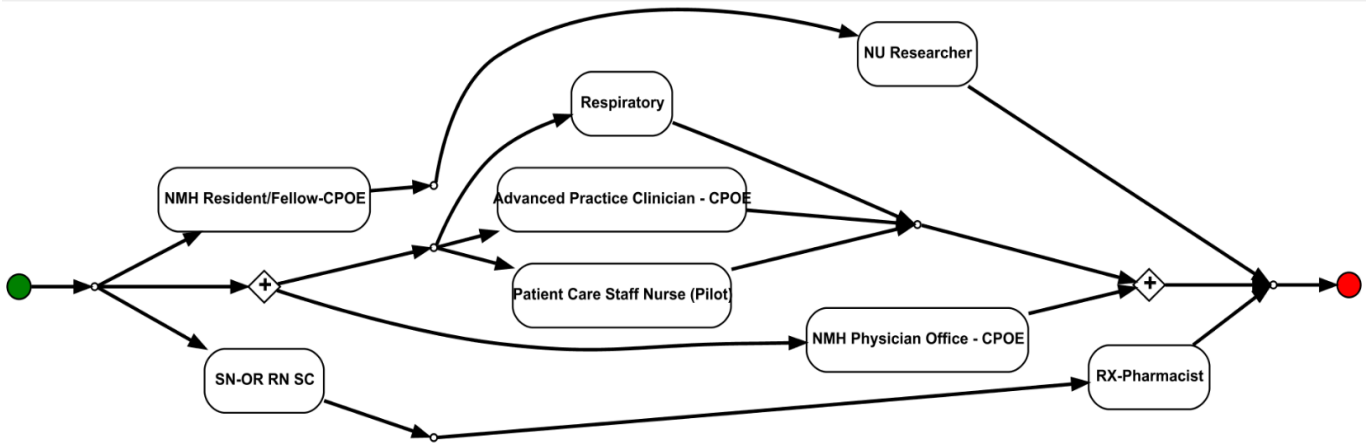

**Figure A12 Process graph of workflow w<sub>12</sub>**

**Workflow w<sub>13</sub>**

|                                                                                |         |
|--------------------------------------------------------------------------------|---------|
| NMH Physician Office - CPOE -> Med Student-CPOE                                | 0.02844 |
| Med Student-CPOE -> NMH Physician Office - CPOE                                | 0.02717 |
| Unit Secretary 2 -> NMH Physician Office - CPOE                                | 0.02425 |
| NMH Physician Office - CPOE -> Unit Secretary 2                                | 0.02400 |
| Med Student-CPOE -> NMH Physician Office - CPOE -> Med Student-CPOE            | 0.01883 |
| NMH Physician Office - CPOE -> Med Student-CPOE -> NMH Physician Office - CPOE | 0.01878 |
| NMH Physician Office - CPOE -> Unit Secretary 2 -> Unit Secretary 2            | 0.01678 |
| Unit Secretary 2 -> NMH Physician Office - CPOE -> Unit Secretary 2            | 0.01673 |
| Unit Secretary 2 -> Unit Secretary 2 -> NMH Physician Office - CPOE            | 0.01663 |
| NMH Physician Office - CPOE -> Unit Secretary 2 -> NMH Physician Office - CPOE | 0.01654 |

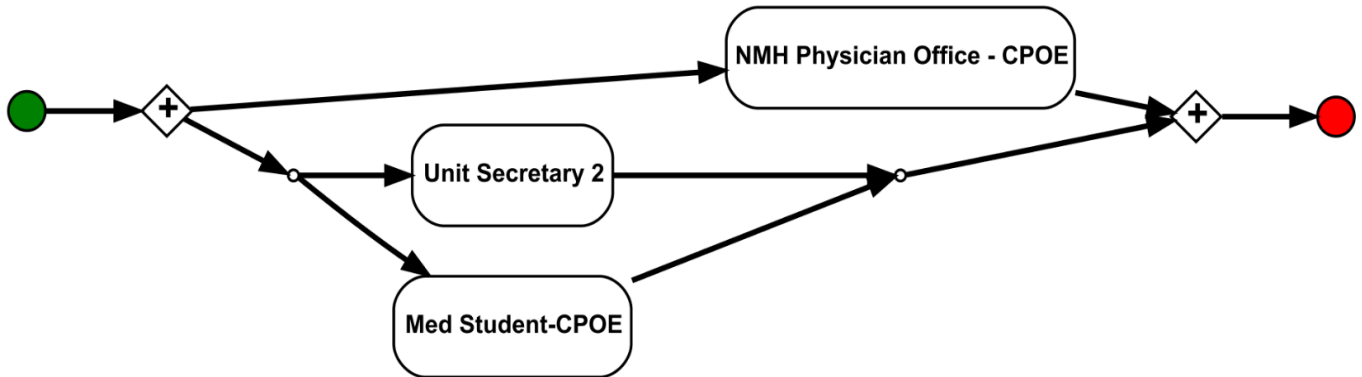

**Figure A13 Process graph of workflow w<sub>13</sub>**

**Workflow w<sub>14</sub>**

|                                                                                                                       |         |
|-----------------------------------------------------------------------------------------------------------------------|---------|
| NMH Physician Office - CPOE -> Physician Office                                                                       | 0.03611 |
| Physician Office -> NMH Physician Office - CPOE                                                                       | 0.03096 |
| NMH Physician Office - CPOE -> Physician Office -> NMH Physician Office - CPOE                                        | 0.02538 |
| Physician Office -> NMH Physician Office - CPOE -> Physician Office                                                   | 0.02345 |
| Medical Records - Scanner -> Medical Records                                                                          | 0.02318 |
| NMH Physician Office - CPOE -> Physician Office -> NMH Physician Office - CPOE -> Physician Office                    | 0.02307 |
| NMH Physician Office - CPOE -> Physician Office -> NMH Physician Office - CPOE -> Physician Office-> Physician Office | 0.02302 |
| Patient Care Assistive Staff -> NMH Anesthesia-CPOE                                                                   | 0.01739 |
| NMH Anesthesia-CPOE -> NMH Anesthesia-CPOE                                                                            | 0.01503 |
| ED Patient Care Staff Nurse -> Patient Care Staff Nurse (Pilot)                                                       | 0.01277 |

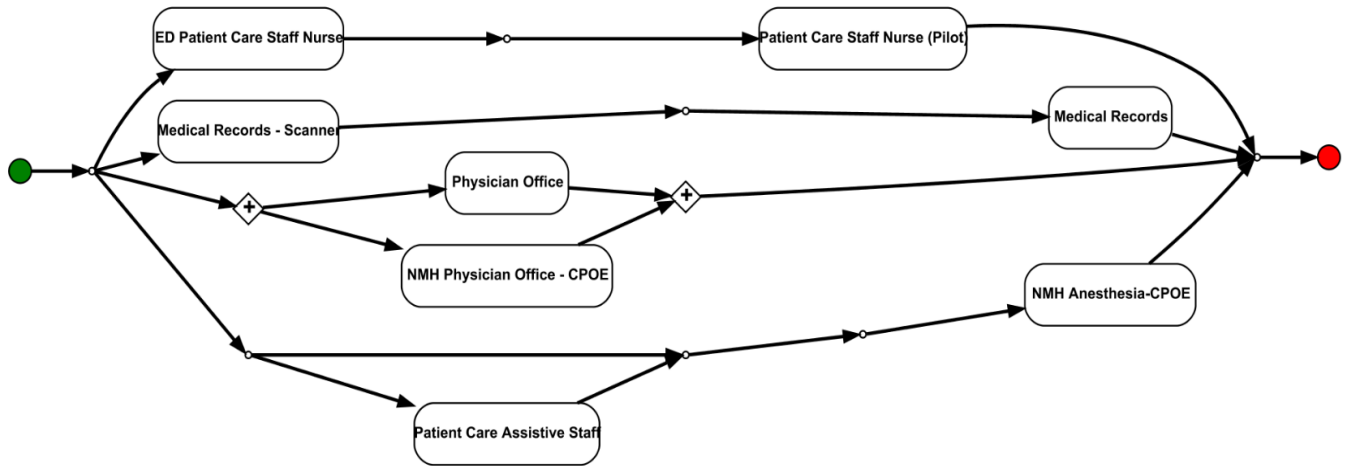

**Figure A14 Process graph of workflow w<sub>14</sub>**

**Workflow w<sub>15</sub>**

|                                                                                                                          |         |
|--------------------------------------------------------------------------------------------------------------------------|---------|
| Attending Phys/Prov -> NMH Physician-CPOE                                                                                | 0.04076 |
| NMH Physician-CPOE -> Patient Care Staff Nurse - Lactation                                                               | 0.01873 |
| RAD - Technologist -> NMH Physician Hospitalist-CPOE                                                                     | 0.01765 |
| NMH Physician Hospitalist-CPOE -> RAD - Technologist                                                                     | 0.01726 |
| Patient Care Staff Nurse - Lactation -> NMH Physician-CPOE                                                               | 0.01711 |
| NMH Physician-CPOE -> Patient Care Staff Nurse - Lactation -> NMH Physician-CPOE                                         | 0.01277 |
| Patient Care Staff Nurse-Lactation -> Patient Care Staff Nurse-Lactation -> NMH Physician-CPOE                           | 0.01250 |
| NMH Physician-CPOE -> Patient Care Staff Nurse - Lactation -> Patient Care Staff Nurse - Lactation                       | 0.01246 |
| Patient Care Staff Nurse - Lactation -> NMH Physician-CPOE -> Patient Care Staff Nurse - Lactation                       | 0.01238 |
| Patient Care Staff Nurse - Lactation -> NMH Physician-CPOE -> Patient Care Staff Nurse - Lactation -> NMH Physician-CPOE | 0.01230 |

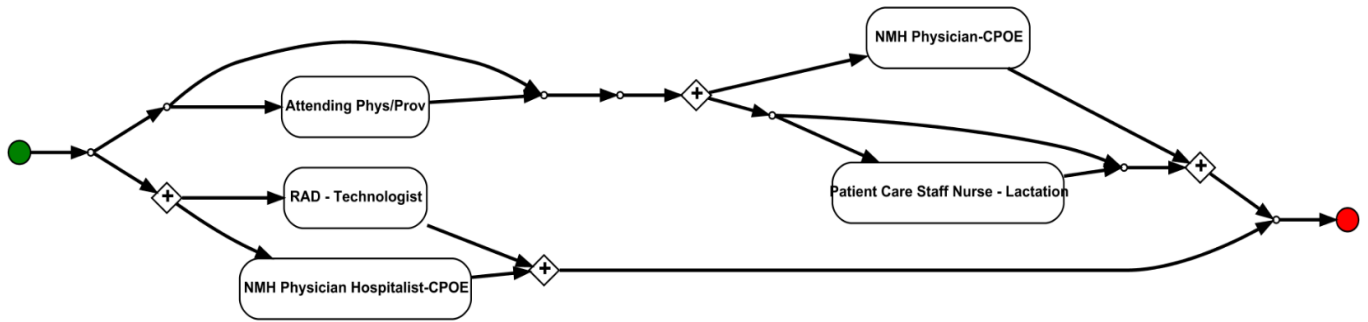

**Figure A15 Process graph of workflow w<sub>15</sub>**

**Workflow w<sub>16</sub>**

|                                                             |         |
|-------------------------------------------------------------|---------|
| SN-RN/Customer Service -> UR/QA 1                           | 0.01997 |
| UR/QA 1 -> SN-RN/Customer Service                           | 0.01993 |
| RX-Pharmacist -> Rehab OT                                   | 0.01908 |
| Rehab PT -> NMH Physician-CPOE                              | 0.01882 |
| Rehab OT -> RX-Pharmacist                                   | 0.01856 |
| NMH Physician-CPOE -> Rehab PT                              | 0.01660 |
| Respiratory -> Dietary 2                                    | 0.01617 |
| Dietary 2 -> Respiratory                                    | 0.01506 |
| UR/QA 1 -> ED Registration                                  | 0.01493 |
| SN-RN/Customer Service -> UR/QA 1 -> SN-RN/Customer Service | 0.01390 |

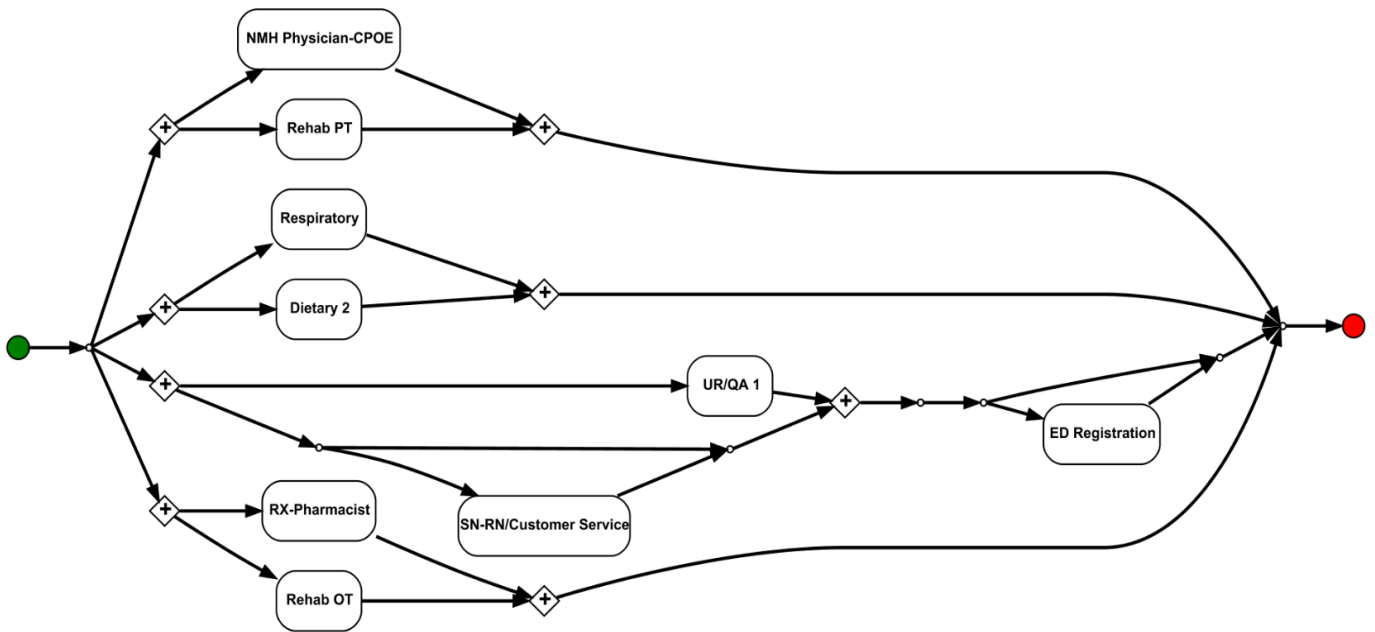

**Figure A16 Process graph of workflow w<sub>16</sub>**

**Workflow w<sub>17</sub>**

|                                                                                                                    |         |
|--------------------------------------------------------------------------------------------------------------------|---------|
| NMH Physician Office - CPOE -> Medical Records - Scanner                                                           | 0.04950 |
| UR/QA 1 -> ED Coder                                                                                                | 0.03544 |
| ED Coder -> UR/QA 1                                                                                                | 0.03161 |
| NMH Physician Office - CPOE -> Medical Records - Scanner -> Medical Records - Scanner                              | 0.02888 |
| NMH Physician Office - CPOE -> Medical Records - Scanner -> Medical Records - Scanner -> Medical Records - Scanner | 0.02674 |
| UR/QA 1 -> ED Coder -> UR/QA 1                                                                                     | 0.02411 |
| UR/QA 1 -> ED Coder -> ED Coder                                                                                    | 0.02316 |
| ED Coder -> UR/QA 1 -> ED Coder                                                                                    | 0.02296 |
| ED Coder -> ED Coder -> UR/QA 1                                                                                    | 0.02291 |
| RX-Pharmacist -> ED Patient Care Staff Nurse                                                                       | 0.02147 |

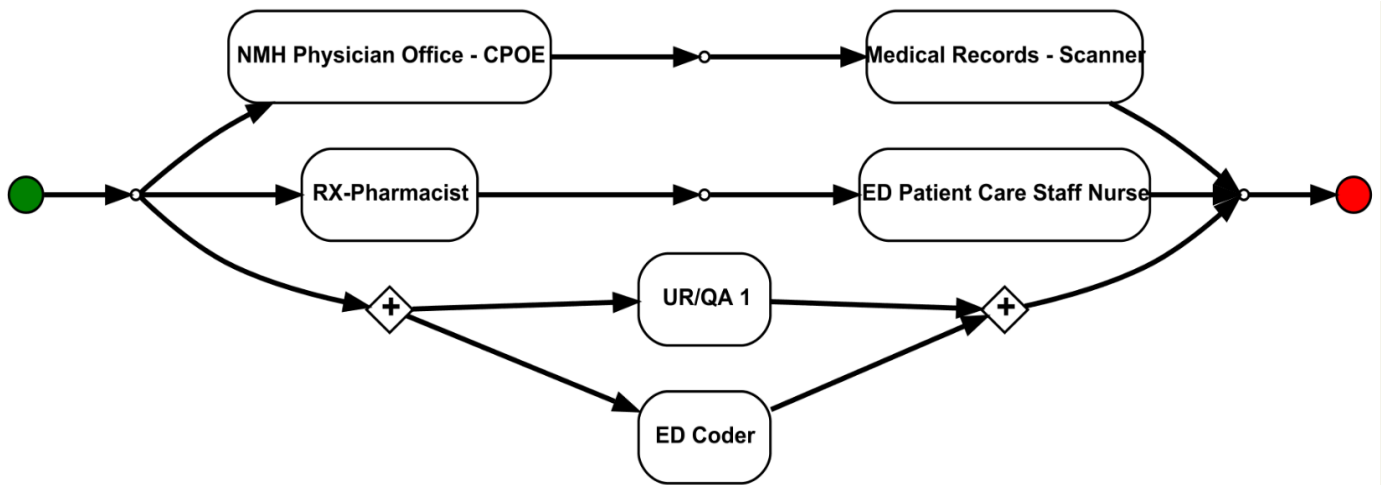

**Figure A17** Process graph of workflow w<sub>17</sub>

**Workflow w<sub>18</sub>**

|                                                       |         |
|-------------------------------------------------------|---------|
| Med Student-CPOE -> SN-OR RN SC                       | 0.02884 |
| SN-OR RN SC -> Med Student-CPOE                       | 0.02869 |
| Advanced Practice Clinician - CPOE -> Medical Records | 0.02234 |
| NMH Resident/Fellow-CPOE -> Medical Records - Scanner | 0.02112 |
| Medical Records - Scanner -> NMH Resident/Fellow-CPOE | 0.02092 |
| SN-OR RN SC -> Med Student-CPOE -> SN-OR RN SC        | 0.02026 |
| Med Student-CPOE -> SN-OR RN SC -> Med Student-CPOE   | 0.01985 |
| Medical Records -> Advanced Practice Clinician - CPOE | 0.01985 |
| Med Student-CPOE -> Dietary 1                         | 0.01874 |
| Dietary 1 -> Med Student-CPOE                         | 0.01798 |

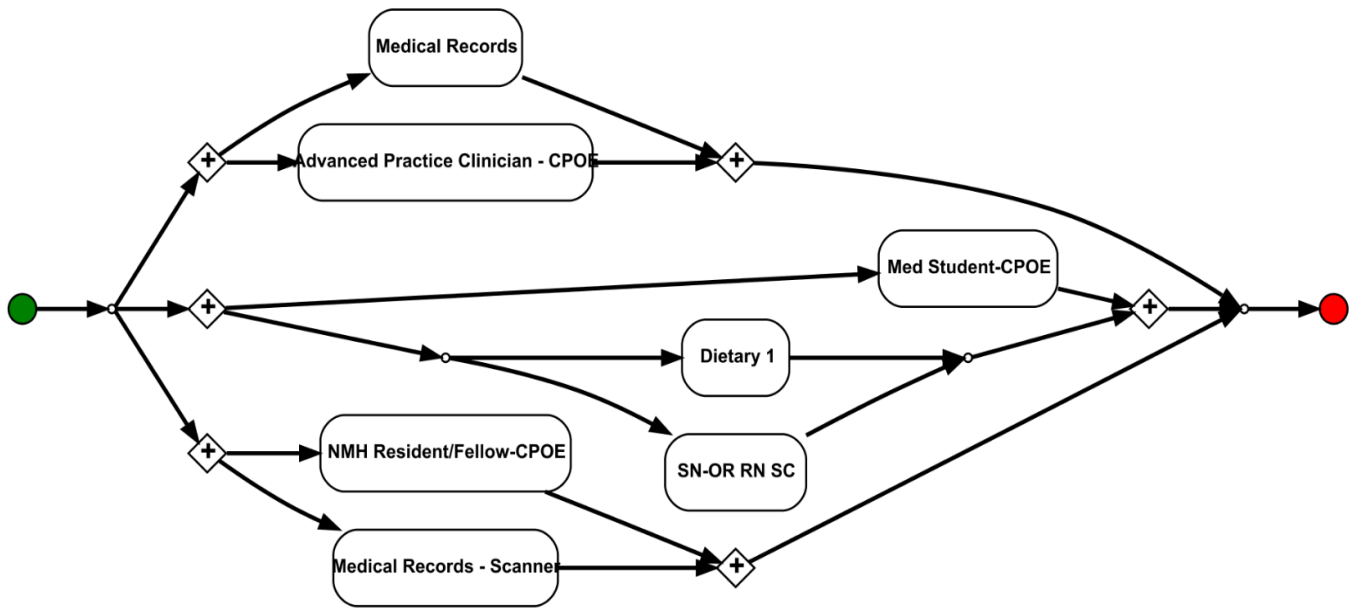

**Figure A18 Process graph of workflow w<sub>18</sub>**



**Workflow w<sub>19</sub>**

|                                                                            |         |
|----------------------------------------------------------------------------|---------|
| Advanced Practice Clinician - CPOE -> Physician Office                     | 0.01585 |
| Physician Office -> Advanced Practice Clinician - CPOE                     | 0.01518 |
| SN-OR RN SC -> Patient Care Assistive Staff                                | 0.01471 |
| Patient Care Assistive Staff -> SN-OR RN SC                                | 0.01371 |
| Unit Secretary 1 -> Rehab PT                                               | 0.01364 |
| Rehab PT -> Unit Secretary 1                                               | 0.01331 |
| Respiratory -> SN-RN/Customer Service                                      | 0.01237 |
| SN-RN/Customer Service -> NMH Physician Hospitalist-CPOE                   | 0.01150 |
| NMH Physician Hospitalist-CPOE -> SN-RN/Customer Service                   | 0.01124 |
| Physician Office -> Advanced Practice Clinician - CPOE -> Physician Office | 0.01087 |

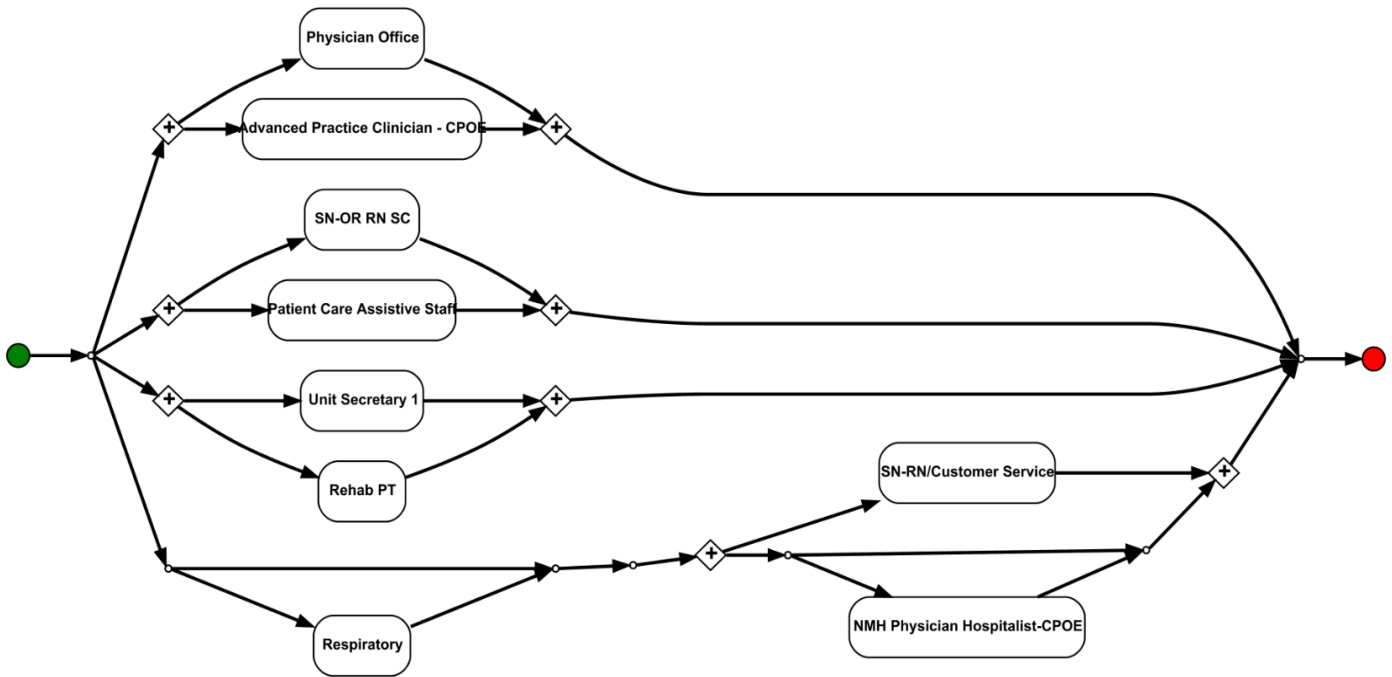

**Figure A19 Process graph of workflow w<sub>19</sub>**

**Workflow w<sub>20</sub>**

|                                                                                                                |         |
|----------------------------------------------------------------------------------------------------------------|---------|
| NMH Physician Office - CPOE -> SN-RN/Customer Service                                                          | 0.04603 |
| SN-RN/Customer Service -> NMH Physician Office - CPOE                                                          | 0.03152 |
| SN-RN/Customer Service -> NMH Physician Office - CPOE -> SN-RN/Customer Service                                | 0.02764 |
| Unit Secretary 1 -> SN-RN/Customer Service                                                                     | 0.02753 |
| NMH Physician Office - CPOE -> SN-RN/Customer Service -> NMH Physician Office - CPOE                           | 0.02727 |
| NMH Physician Office - CPOE -> SN-RN/Customer Service -> NMH Physician Office - CPOE -> SN-RN/Customer Service | 0.02685 |
| SN-RN/Customer Service -> NMH Physician Office - CPOE -> SN-RN/Customer Service -> NMH Physician Office - CPOE | 0.02638 |
| NMH Anesthesia-CPOE -> NMH Physician Office - CPOE                                                             | 0.02559 |
| NMH Physician Office - CPOE -> NMH Anesthesia-CPOE                                                             | 0.02454 |
| NMH Physician Office - CPOE -> NMH Anesthesia-CPOE -> NMH Physician Office - CPOE                              | 0.01744 |

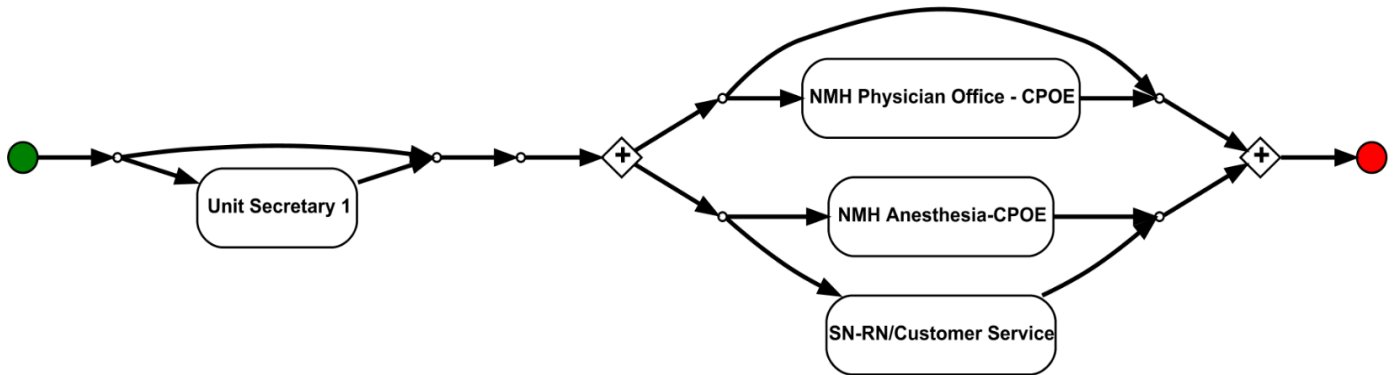

**Figure A20 Process graph of workflow w<sub>20</sub>**

## Workflow w<sub>21</sub>

|                                                                          |         |
|--------------------------------------------------------------------------|---------|
| Rehab PT -> Medical Records                                              | 0.01790 |
| NMH Physician Hospitalist-CPOE -> Physician Office                       | 0.01708 |
| NMH Physician Hospitalist-CPOE -> Dietary 1                              | 0.01685 |
| Physician Office -> NMH Physician Hospitalist-CPOE                       | 0.01648 |
| Dietary 1 -> NMH Physician Hospitalist-CPOE                              | 0.01648 |
| NMH Physician Hospitalist-CPOE -> Advanced Practice Clinician - CPOE     | 0.01400 |
| Medical Records -> Rehab PT                                              | 0.01336 |
| Patient Care Assistive Staff -> MLPN-Medicating Licensed Practical Nurse | 0.01310 |
| RAD - Mgr/RC -> RX-Pharmacist                                            | 0.01310 |
| Transfer -> Patient Care Assistive Staff                                 | 0.01306 |

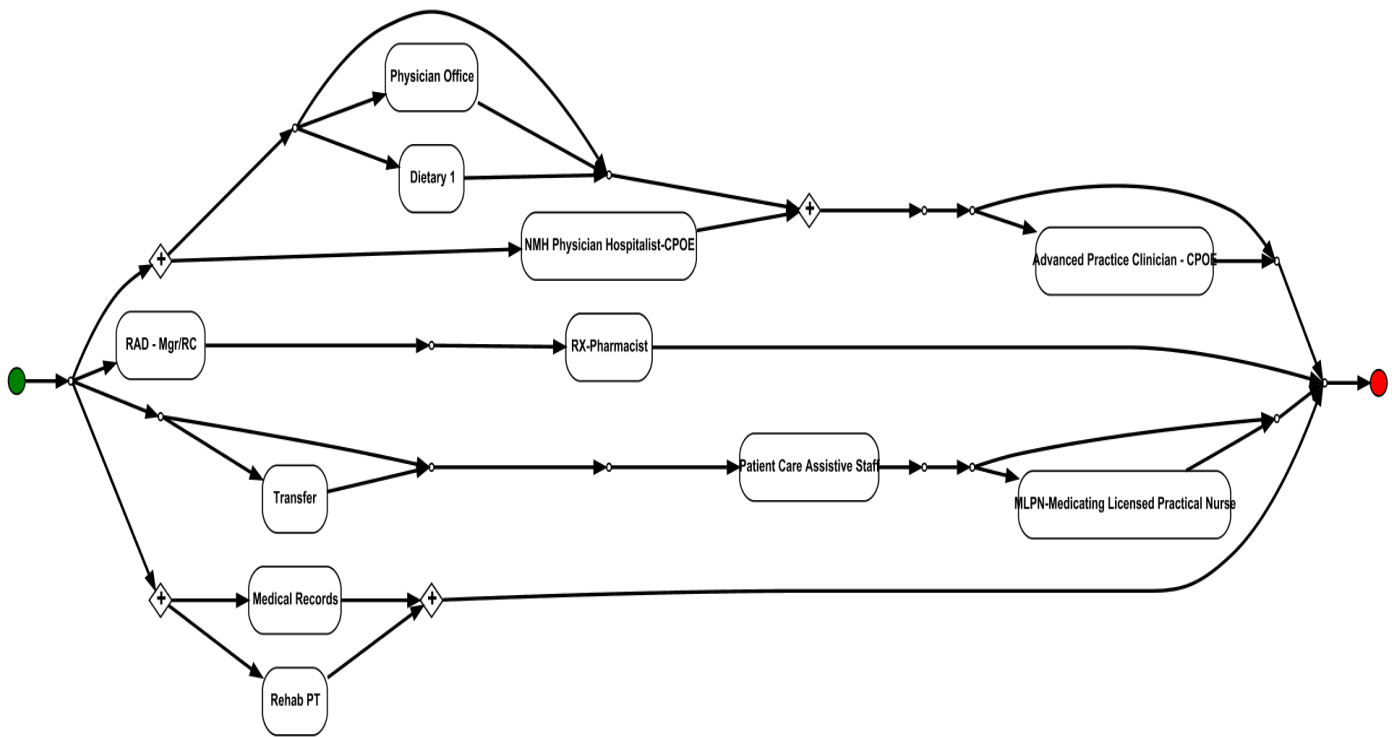

Figure A21 Process graph of workflow w<sub>21</sub>

**Workflow w<sub>22</sub>**

|                                                                       |         |
|-----------------------------------------------------------------------|---------|
| NMH Physician-CPOE -> Medical Records - Scanner                       | 0.03886 |
| Medical Records -> Med Student-CPOE                                   | 0.03869 |
| Med Student-CPOE -> Medical Records                                   | 0.03750 |
| Medical Records - Scanner -> NMH Physician-CPOE                       | 0.03054 |
| Unit Secretary 2 -> Medical Records                                   | 0.02761 |
| NMH Physician-CPOE -> Medical Records - Scanner -> NMH Physician-CPOE | 0.02685 |
| Med Student-CPOE -> Medical Records -> Med Student-CPOE               | 0.02652 |
| Medical Records -> Med Student-CPOE -> Medical Records                | 0.02647 |
| Unit Secretary 1 -> RAD - Technologist                                | 0.02587 |
| RAD - Technologist -> Unit Secretary 1                                | 0.02576 |

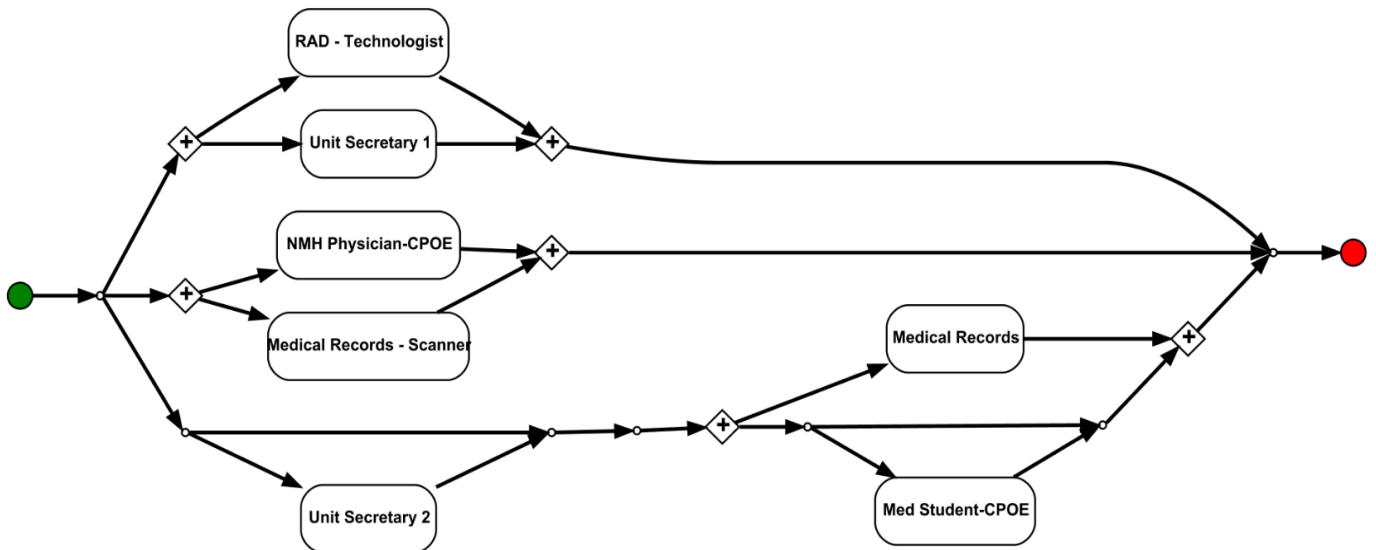

**Figure A22 Process graph of workflow w<sub>22</sub>**

## Workflow w<sub>23</sub>

|                                                                |         |
|----------------------------------------------------------------|---------|
| ED Assistant -> ED NMH Physician-CPOE                          | 0.01766 |
| ED NMH Physician-CPOE -> ED Assistant                          | 0.01679 |
| ED NMH Physician-CPOE -> UR/QA 1                               | 0.01586 |
| UR/QA 1 -> ED NMH Physician-CPOE                               | 0.01437 |
| Respiratory -> ED Coder                                        | 0.01275 |
| ED Assistant -> ED NMH Physician-CPOE -> ED NMH Physician-CPOE | 0.01196 |
| ED NMH Physician-CPOE -> ED Assistant -> ED NMH Physician-CPOE | 0.01196 |
| ED Assistant -> Patient Care Staff Nurse                       | 0.01185 |
| ED Assistant -> ED NMH Physician-CPOE -> ED Assistant          | 0.01185 |
| ED NMH Physician-CPOE -> ED NMH Physician-CPOE -> ED Assistant | 0.01185 |

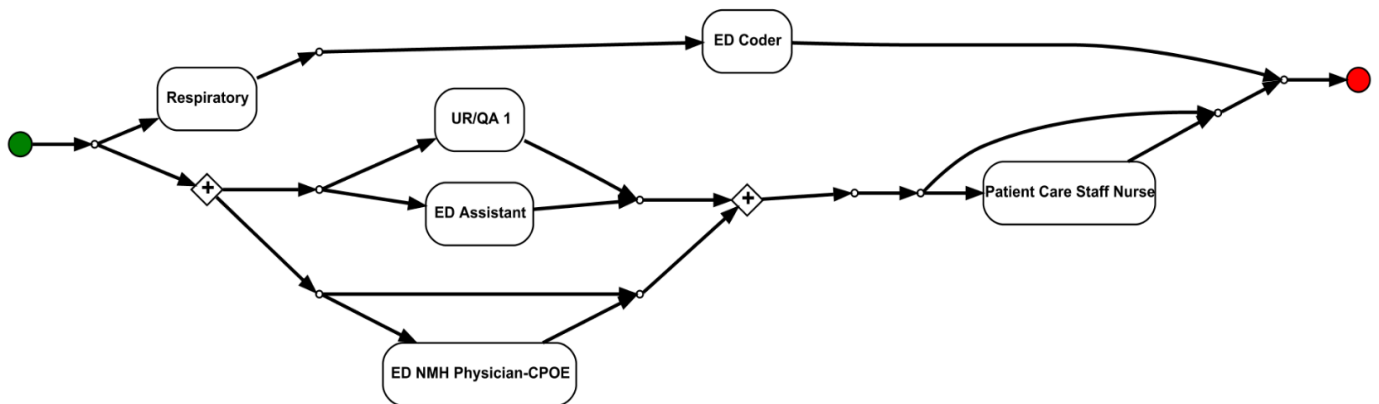

Figure A23 Process graph of workflow w<sub>23</sub>

**Workflow w<sub>24</sub>**

|                                                                             |         |
|-----------------------------------------------------------------------------|---------|
| ED Assistant -> ED Unit Secretary                                           | 0.01999 |
| NMH Physician-CPOE -> Laboratory 1                                          | 0.01614 |
| ED Unit Secretary -> ED Assistant                                           | 0.01550 |
| Laboratory 1 -> NMH Physician-CPOE                                          | 0.01366 |
| ED Assistant -> ED Unit Secretary -> ED Unit Secretary                      | 0.01246 |
| ED Unit Secretary -> ED Assistant -> ED Assistant                           | 0.01237 |
| ED Assistant -> ED Unit Secretary -> ED Assistant                           | 0.01233 |
| ED Unit Secretary -> ED Assistant -> ED Unit Secretary                      | 0.01229 |
| ED Unit Secretary -> ED Unit Secretary -> ED Assistant                      | 0.01229 |
| ED Unit Secretary -> ED Unit Secretary -> ED Assistant -> ED Unit Secretary | 0.01224 |

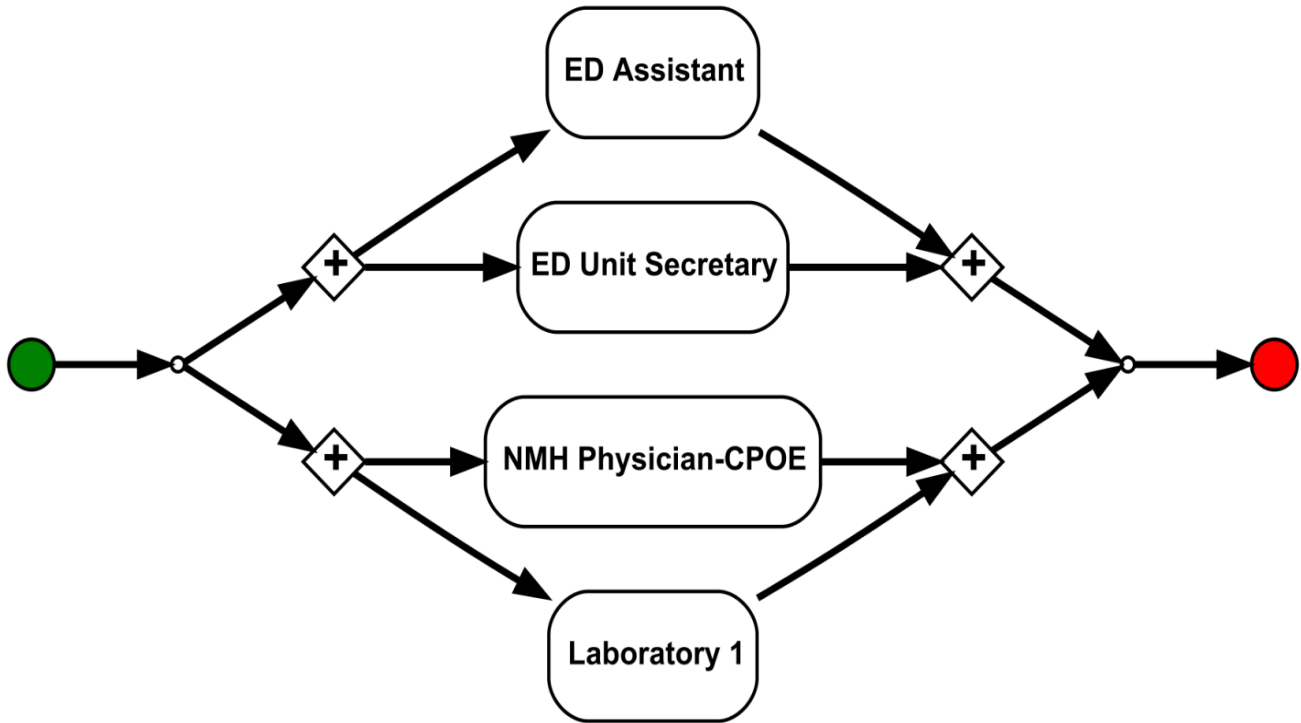

**Figure A24 Process graph of workflow w<sub>24</sub>**

**Workflow w<sub>25</sub>**

|                                                                      |         |
|----------------------------------------------------------------------|---------|
| Attending Phys/Prov -> NMH Physician-CPOE                            | 0.09443 |
| Attending Phys/Prov -> NMH Physician Office - CPOE                   | 0.06282 |
| Medical Records -> SN-Management                                     | 0.03038 |
| NMH Resident/Fellow-CPOE -> ED Coder                                 | 0.02304 |
| Patient Care Staff Nurse - Lactation -> Patient Care Assistive Staff | 0.02122 |
| ED Coder -> NMH Resident/Fellow-CPOE                                 | 0.02122 |
| Patient Care Assistive Staff -> Patient Care Staff Nurse - Lactation | 0.02092 |
| Unit Secretary 2 -> Unit Secretary 2                                 | 0.02028 |
| Dietary 1 -> Rehab PT                                                | 0.01900 |
| Rehab PT -> Dietary 1                                                | 0.01772 |

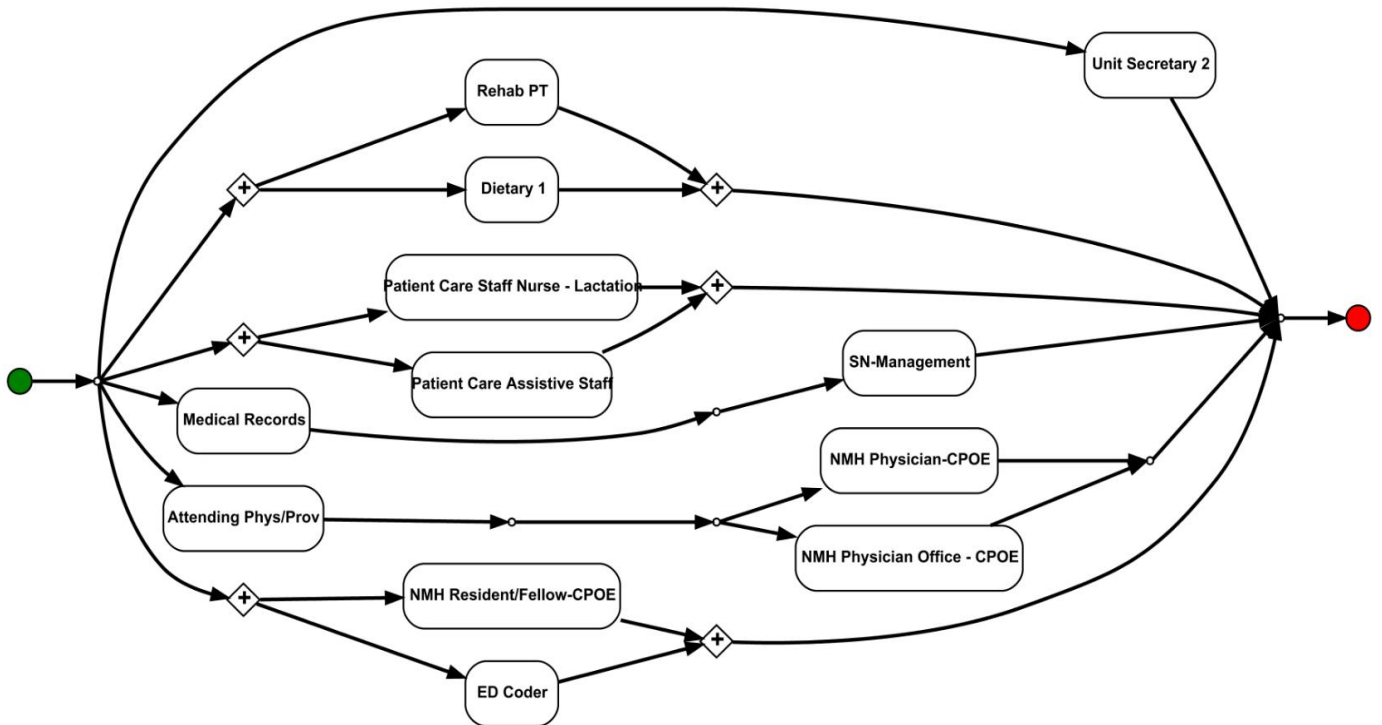

**Figure 25** Process graph of workflow w<sub>25</sub>

## Appendix C: 25 Health Condition Collection Topics

As noted in the main manuscript, the framework discovered 25 health condition collection (HCC) topics. Each topic was constrained to consist of the top 10 PheWAS codes with the highest probabilities for that topic. Here we report on each topic, showing its PheWAS codes, the corresponding descriptions, and the probabilities of realizing that code for the topic. Each HCC topic was summarized with a label.

### HCC h<sub>1</sub>

#### [Skull associated injury]

|        |                                                                    |         |
|--------|--------------------------------------------------------------------|---------|
| 1010   | Other tests                                                        | 0.38596 |
| 819    | Skull fracture and other intracranial injury                       | 0.13715 |
| 1008   | Internal injury to organs                                          | 0.13495 |
| 540.11 | Acute appendicitis                                                 | 0.02456 |
| 650    | Normal delivery                                                    | 0.02298 |
| 805    | Fracture of vertebral column without mention of spinal cord injury | 0.01889 |
| 915    | Superficial injury without mention of infection                    | 0.01669 |
| 870.3  | Other open wound of head and face                                  | 0.01574 |
| 807    | Fracture of ribs                                                   | 0.01039 |
| 562.2  | Diverticulitis                                                     | 0.00976 |

### HCC h<sub>2</sub>

#### [Child birth]

|        |                                                                 |         |
|--------|-----------------------------------------------------------------|---------|
| 1010   | Other tests                                                     | 0.25000 |
| 637    | Short gestation; low birth weight; and fetal growth retardation | 0.18058 |
| 656    | Other perinatal conditions                                      | 0.16240 |
| 656.1  | Perinatal jaundice/isoimmunization                              | 0.10374 |
| 651    | Multiple gestation                                              | 0.05558 |
| 656.3  | Endocrine and metabolic disturbances of fetus and newborn       | 0.05200 |
| 747.11 | Cardiac shunt/ heart septal defect                              | 0.02664 |
| 656.2  | Other respiratory conditions of fetus and newborn               | 0.02587 |
| 647    | Infectious & parasitic conditions complicating pregnancy        | 0.02203 |
| 747.13 | Congenital anomalies of great vessels                           | 0.01127 |



### HCC h<sub>3</sub>

#### [Hypothyroidism connected]

|        |                                    |         |
|--------|------------------------------------|---------|
| 244    | Hypothyroidism                     | 0.26982 |
| 285.9  | Anemia NOS                         | 0.12089 |
| 276.14 | Hypopotassemia                     | 0.11665 |
| 276.5  | Hypovolemia                        | 0.09230 |
| 276.12 | Hyposmolality and/or hyponatremia  | 0.05351 |
| 275.3  | Magnesium metabolism disorder      | 0.05210 |
| 275.51 | Hypocalcemia                       | 0.01529 |
| 593    | Hematuria                          | 0.01076 |
| 458.9  | Hypotension NOS                    | 0.01048 |
| 465    | Acute upper respiratory infections | 0.00963 |

### HCC h<sub>4</sub>

#### [Oncology]

|        |                                                                        |         |
|--------|------------------------------------------------------------------------|---------|
| 783    | Fever of unknown origin                                                | 0.06768 |
| 561.1  | Diarrhea                                                               | 0.06376 |
| 197    | Chemotherapy                                                           | 0.06141 |
| 284.1  | Pancytopenia                                                           | 0.04651 |
| 202.2  | Non-Hodgkins lymphoma                                                  | 0.03972 |
| 288.11 | Neutropenia                                                            | 0.03815 |
| 081    | Infection/inflammation of internal prosthetic device, implant or graft | 0.03580 |
| 204.4  | Multiple myeloma                                                       | 0.03554 |
| 962.1  | Adverse effects of adrenal cortical steroids                           | 0.03083 |
| 287.3  | Thrombocytopenia                                                       | 0.02535 |

## HCC h<sub>5</sub>

### [Thrombosis]

|        |                                                                  |         |
|--------|------------------------------------------------------------------|---------|
| 452    | Venous embolism & thrombosis                                     | 0.19148 |
| 286.5  | Hemorrhagic disorder due to intrinsic circulating anticoagulants | 0.09945 |
| 452.2  | Deep vein thrombosis                                             | 0.09478 |
| 415.1  | Pulmonary embolism and infarction                                | 0.04698 |
| 286.9  | Abnormal coagulation profile                                     | 0.03846 |
| 276.5  | Hypovolemia                                                      | 0.03819 |
| 282.5  | Sickle cell anemia                                               | 0.03407 |
| 695.42 | Systemic lupus erythematosus                                     | 0.03022 |
| 415    | pulmonary heart disease                                          | 0.02857 |
| 288.2  | Elevated white blood cell count                                  | 0.02802 |

## HCC h<sub>6</sub>

### [Diabetes]

|        |                               |         |
|--------|-------------------------------|---------|
| 250.2  | Type 2 diabetes               | 0.15440 |
| 272.1  | Hyperlipidemia                | 0.13317 |
| 401.1  | Essential hypertension        | 0.11056 |
| 250.3  | Insulin pump user             | 0.07031 |
| 707.2  | Chronic ulcer of leg or foot  | 0.05018 |
| 681.5  | Cellulitis and abscess of leg | 0.04577 |
| 250.24 | Type 2 diabetic neuropathy    | 0.04136 |
| 250.6  | Polyneuropathy in diabetes    | 0.04053 |
| 443.9  | Peripheral arterial disease   | 0.02123 |
| 536.3  | Gastroparesis                 | 0.01902 |

## HCC h<sub>7</sub>

### [Osteoarthritis]

|        |                                  |         |
|--------|----------------------------------|---------|
| 401.1  | Essential hypertension           | 0.15078 |
| 530.11 | GERD                             | 0.10161 |
| 740.1  | Osteoarthritis; localized        | 0.10134 |
| 272.11 | Hypercholesterolemia             | 0.06993 |
| 743.11 | Osteoporosis                     | 0.05381 |
| 740.9  | Osteoarthritis NOS               | 0.03851 |
| 296.2  | Depression                       | 0.03633 |
| 714.1  | Rheumatoid arthritis             | 0.03278 |
| 720.1  | Spinal stenosis of lumbar region | 0.02513 |
| 1015   | Effects of other external causes | 0.02404 |

## HCC h<sub>8</sub>

### [Urinary infection]

|       |                                 |         |
|-------|---------------------------------|---------|
| 591   | Urinary tract infection         | 0.22461 |
| 707.1 | Decubitus ulcer                 | 0.16335 |
| 344   | Other paralytic syndromes       | 0.04819 |
| 595   | Hydronephrosis                  | 0.02804 |
| 411.8 | Chronic ischemic heart disease  | 0.02695 |
| 590   | Infections of kidney            | 0.02668 |
| 596.5 | Functional disorders of bladder | 0.02614 |
| 335   | Multiple sclerosis              | 0.02586 |
| 411.3 | Angina pectoris                 | 0.02233 |
| 285.2 | Anemia of chronic disease       | 0.02151 |

## HCC h<sub>9</sub>

### [Late pregnancy]

|       |                                                        |         |
|-------|--------------------------------------------------------|---------|
| 1010  | Other tests                                            | 0.32474 |
| 665   | Obstetrical/birth trauma                               | 0.14830 |
| 645   | Late pregnancy and failed induction                    | 0.12573 |
| 649   | Other conditions of the mother complicating pregnancy  | 0.11489 |
| 658   | Problems associated with amniotic cavity and membranes | 0.09320 |
| 661   | Fetal distress and abnormal forces of labor            | 0.07093 |
| 402   | Elevated blood pressure reading                        | 0.00938 |
| 261.2 | Vitamin B-complex deficiencies                         | 0.00352 |
| 351   | Other peripheral nerve disorders                       | 0.00352 |
| 597.1 | Urethral stricture (not specified as infectious)       | 0.00293 |

## HCC h<sub>10</sub>

### [Sepsis]

|        |                                   |         |
|--------|-----------------------------------|---------|
| 585.1  | Acute renal failure               | 0.10666 |
| 480    | Pneumonia                         | 0.07747 |
| 994.2  | Sepsis                            | 0.07299 |
| 509.1  | Respiratory failure               | 0.06875 |
| 276.41 | Acidosis                          | 0.06593 |
| 389    | Hearing loss                      | 0.05628 |
| 276.12 | Hyposmolality and/or hyponatremia | 0.04639 |
| 797    | Shock                             | 0.04497 |
| 260    | Protein-calorie malnutrition      | 0.03956 |
| 507    | Pleurisy; pleural effusion        | 0.03508 |

## HCC h<sub>11</sub>

### [Prostate]

|        |                            |         |
|--------|----------------------------|---------|
| 272.1  | Hyperlipidemia             | 0.15198 |
| 401.1  | Essential hypertension     | 0.15061 |
| 600    | Hyperplasia of prostate    | 0.10215 |
| 496    | Chronic airway obstruction | 0.08921 |
| 185    | Prostate cancer            | 0.08260 |
| 599.2  | Retention of urine         | 0.04598 |
| 250.2  | Type 2 diabetes            | 0.03662 |
| 189.21 | Bladder cancer             | 0.02285 |
| 496.1  | Emphysema                  | 0.02065 |
| 290.1  | Dementias                  | 0.01432 |

## HCC h<sub>12</sub>

### [Birth trauma]

|       |                                                                        |         |
|-------|------------------------------------------------------------------------|---------|
| 665   | Obstetrical/birth trauma                                               | 0.43332 |
| 663   | Umbilical cord complications during labor and delivery                 | 0.21789 |
| 649   | Other conditions of the mother complicating pregnancy                  | 0.11699 |
| 659   | Indications for care or intervention related to labor and delivery NEC | 0.09381 |
| 655.1 | Abnormality in fetal heart rate or rhythm                              | 0.06054 |
| 658   | Problems associated with amniotic cavity and membranes                 | 0.00273 |
| 642.1 | Preeclampsia and eclampsia                                             | 0.00245 |
| 010   | Tuberculosis                                                           | 0.00218 |
| 655   | Known or suspected fetal abnormality                                   | 0.00191 |
| 669   | Complications of labor and delivery NEC                                | 0.00191 |

## HCC h<sub>13</sub>

### [Cancer]

|        |                                                   |          |
|--------|---------------------------------------------------|----------|
| 198.4  | Secondary malignant neoplasm of liver             | 0.15577  |
| 198.6  | Secondary malignancy of bone                      | 0.11517  |
| 165.1  | Lung cancer                                       | 0.104845 |
| 198    | Secondary malignant neoplasm                      | 0.04668  |
| 198.2  | Secondary malignancy of lung                      | 0.04643  |
| 198.1  | Secondary malignancy of lymph nodes               | 0.04592  |
| 153.2  | Colon cancer                                      | 0.03608  |
| 198.3  | Secondary malignant neoplasm of digestive systems | 0.03381  |
| 563    | Constipation                                      | 0.06485  |
| 174.11 | Breast cancer                                     | 0.10295  |

## HCC h<sub>14</sub>

### [Cerebrovascular disease]

|        |                                                     |         |
|--------|-----------------------------------------------------|---------|
| 401.1  | Essential hypertension                              | 0.16744 |
| 433.31 | Transient cerebral ischemia                         | 0.07977 |
| 433.8  | Late effects of cerebrovascular disease             | 0.07324 |
| 345    | Epilepsy, recurrent seizures, convulsions           | 0.04846 |
| 290.3  | Persistent mental disorders due to other conditions | 0.03730 |
| 345.3  | Convulsions                                         | 0.03539 |
| 788    | Syncope and collapse                                | 0.03267 |
| 433.21 | Ischemic stroke                                     | 0.02995 |
| 272.1  | Hyperlipidemia                                      | 0.02777 |
| 798    | Malaise and fatigue                                 | 0.02532 |

## HCC h<sub>15</sub>

### [Depression]

|       |                         |         |
|-------|-------------------------|---------|
| 296.2 | Depression              | 0.08719 |
| 300.1 | Anxiety disorder        | 0.08134 |
| 789   | Nausea and vomiting     | 0.07270 |
| 785   | Abdominal pain          | 0.05794 |
| 338   | Pain NEC                | 0.05265 |
| 760   | Back pain               | 0.05153 |
| 300.4 | Dysthymic disorder      | 0.04819 |
| 340   | Migraine                | 0.04262 |
| 563   | Constipation            | 0.03788 |
| 280.1 | Iron deficiency anemias | 0.03705 |

## HCC h<sub>16</sub>

### [Heart failure]

|        |                                    |         |
|--------|------------------------------------|---------|
| 427.21 | Atrial fibrillation                | 0.20371 |
| 428.1  | Systolic/diastolic heart failure   | 0.18946 |
| 428    | Heart failure                      | 0.10423 |
| 425.1  | Primary/intrinsic cardiomyopathies | 0.05539 |
| 415    | pulmonary heart disease            | 0.04454 |
| 427.12 | Paroxysmal ventricular tachycardia | 0.03730 |
| 395.1  | Nonthematic mitral valve disorders | 0.03617 |
| 427.22 | Atrial flutter                     | 0.03595 |
| 426.92 | Cardiac defibrillator in situ      | 0.03414 |
| 411.8  | Chronic ischemic heart disease     | 0.02962 |

## HCC h<sub>17</sub>

### [Fetal abnormality]

|       |                                                                        |         |
|-------|------------------------------------------------------------------------|---------|
| 652   | Malposition and malpresentation of fetus or obstruction                | 0.16853 |
| 658   | Problems associated with amniotic cavity and membranes                 | 0.11036 |
| 655   | Known or suspected fetal abnormality                                   | 0.06310 |
| 669   | Complications of labor and delivery NEC                                | 0.06076 |
| 635.3 | Placenta previa and abruption placenta                                 | 0.05895 |
| 636.2 | Early onset of delivery                                                | 0.05765 |
| 659   | Indications for care or intervention related to labor and delivery NEC | 0.05323 |
| 661   | Fetal distress and abnormal forces of labor                            | 0.05012 |
| 651   | Multiple gestation                                                     | 0.04856 |
| 655.1 | Abnormality in fetal heart rate or rhythm                              | 0.04804 |

## HCC h<sub>18</sub>

### [Essential hypertension and hyperlipidemia]

|        |                                               |         |
|--------|-----------------------------------------------|---------|
| 401.1  | Essential hypertension                        | 0.20079 |
| 250.2  | Type 2 diabetes                               | 0.16901 |
| 327.32 | Obstructive sleep apnea                       | 0.14411 |
| 272.1  | Hyperlipidemia                                | 0.09881 |
| 278.11 | Morbid obesity                                | 0.09828 |
| 278.1  | Obesity                                       | 0.07815 |
| 274.1  | Gout                                          | 0.02172 |
| 465    | Acute upper respiratory infections            | 0.00980 |
| 450    | Noninfectious disorders of lymphatic channels | 0.00848 |
| 550.2  | Diaphragmatic hernia                          | 0.00450 |



## HCC h<sub>19</sub>

### [Tobacco and alcohol]

|       |                                   |         |
|-------|-----------------------------------|---------|
| 316   | Substance addiction and disorders | 0.12156 |
| 318   | Tobacco use disorder              | 0.12129 |
| 317.1 | Alcoholism                        | 0.07686 |
| 296.1 | Bipolar                           | 0.05914 |
| 317   | Alcohol-related disorders         | 0.04443 |
| 418   | Nonspecific chest pain            | 0.04061 |
| 280.1 | Iron deficiency anemias           | 0.02944 |
| 296.2 | Depression                        | 0.02644 |
| 495.2 | Asthma with exacerbation          | 0.02317 |
| 401.1 | Essential hypertension            | 0.02017 |

## HCC h<sub>20</sub>

### [Anemia connected]

|        |                                                         |         |
|--------|---------------------------------------------------------|---------|
| 285.9  | Anemia NOS                                              | 0.19954 |
| 427.3  | Other specified cardiac dysrhythmias                    | 0.08314 |
| 250.42 | Other abnormal glucose                                  | 0.07110 |
| 1013   | Asphyxia and hypoxemia                                  | 0.04472 |
| 508    | Pulmonary collapse; interstitial/compensatory emphysema | 0.04472 |
| 458.9  | Hypotension NOS                                         | 0.04444 |
| 276.6  | Fluid overload                                          | 0.03784 |
| 287.3  | Thrombocytopenia                                        | 0.03354 |
| 850    | Hemorrhage or hematoma complicating a procedure         | 0.02982 |
| 080    | Postoperative infection                                 | 0.02896 |

## HCC h<sub>21</sub>

### [Gastroesophageal reflux disease]

|        |                                                       |         |
|--------|-------------------------------------------------------|---------|
| 530.11 | GERD                                                  | 0.22110 |
| 401.1  | Essential hypertension                                | 0.18709 |
| 495    | Asthma                                                | 0.17498 |
| 272.1  | Hyperlipidemia                                        | 0.05881 |
| 550.2  | Diaphragmatic hernia                                  | 0.02364 |
| 427.7  | Tachycardia NOS                                       | 0.02220 |
| 532    | Dysphagia                                             | 0.01268 |
| 568.1  | Peritoneal adhesions (postoperative) (post infection) | 0.01182 |
| 562.2  | Diverticulitis                                        | 0.01009 |
| 193    | Thyroid cancer                                        | 0.00922 |

## HCC h<sub>22</sub>

### [Liver disease]

|        |                                                     |         |
|--------|-----------------------------------------------------|---------|
| 585.1  | Acute renal failure                                 | 0.06854 |
| 572    | Ascites (nonmalignant)                              | 0.05804 |
| 571.51 | Cirrhosis of liver without mention of alcohol       | 0.04307 |
| 571.8  | Liver abscess and sequelae of chronic liver disease | 0.03388 |
| 276.12 | Hyposmolality and/or hyponatremia                   | 0.03256 |
| 317.11 | Alcoholic liver damage                              | 0.02967 |
| 569.2  | Gastrointestinal complications                      | 0.02889 |
| 560.1  | Paralytic ileus                                     | 0.02784 |
| 573.2  | Liver replaced by transplant                        | 0.02600 |
| 562.1  | Diverticulosis                                      | 0.02468 |

## HCC h<sub>23</sub>

### [Coronary atherosclerosis]

|        |                                                                         |         |
|--------|-------------------------------------------------------------------------|---------|
| 411.4  | Coronary atherosclerosis                                                | 0.52697 |
| 411.2  | Myocardial infarction                                                   | 0.16604 |
| 272.1  | Hyperlipidemia                                                          | 0.07974 |
| 411.8  | Chronic ischemic heart disease                                          | 0.03705 |
| 443.9  | Peripheral arterial disease                                             | 0.02697 |
| 854    | Mechanical complications of cardiac/vascular device, implant, and graft | 0.01595 |
| 442.11 | Abdominal aortic aneurysm                                               | 0.01454 |
| 411.1  | Unstable angina (intermediate coronary syndrome)                        | 0.00962 |
| 285.1  | Acute post hemorrhagic anemia                                           | 0.00586 |
| 585.3  | Chronic renal failure                                                   | 0.00563 |

## HCC h<sub>24</sub>

### [Mother complicating pregnancy]

|        |                                                                        |         |
|--------|------------------------------------------------------------------------|---------|
| 649    | Other conditions of the mother complicating pregnancy                  | 0.16643 |
| 654    | Abnormality pelvic soft tissues & organs complicating pregnancy        | 0.16155 |
| 659    | Indications for care or intervention related to labor and delivery NEC | 0.12396 |
| 218.1  | Uterine leiomyoma                                                      | 0.07633 |
| 665    | Obstetrical/birth trauma                                               | 0.06284 |
| 642    | Hypertension complicating pregnancy                                    | 0.03558 |
| 649.1  | Gestational diabetes                                                   | 0.03300 |
| 626.12 | Excessive or frequent menstruation                                     | 0.02095 |
| 647    | Infectious & parasitic conditions complicating pregnancy               | 0.01865 |
| 615    | Endometriosis                                                          | 0.01808 |

## HCC h<sub>25</sub>

### [Kidney disease]

|        |                                     |         |
|--------|-------------------------------------|---------|
| 401.22 | Hypertensive chronic kidney disease | 0.21740 |
| 585.3  | Chronic renal failure               | 0.14946 |
| 585.32 | End stage renal disease             | 0.09533 |
| 585.31 | Renal dialysis                      | 0.05808 |
| 587    | Kidney replaced by transplant       | 0.05654 |
| 276.13 | Hyperpotassemia                     | 0.05282 |
| 585.1  | Acute renal failure                 | 0.04624 |
| 285.21 | Anemia in chronic kidney disease    | 0.04208 |
| 250.22 | Type 2 diabetic nephropathy         | 0.02279 |
| 250.7  | Diabetic retinopathy                | 0.02060 |
